# Supplementary material
Source: HighWire-hosted journal article supplement (https://www.life-science-alliance.org/content/5/5/e202201369/F2)
Supplement: inline-supplementary-material-1 [file inline-supplementary-material-1.pdf]

**FIGURE 2B**

**ETV2**

|                                  |          |          |          |
|----------------------------------|----------|----------|----------|
| <b>Sykl (1<math>\mu</math>M)</b> | <b>-</b> | <b>+</b> | <b>-</b> |
| <b>Rapamycin (20nM)</b>          | <b>-</b> | <b>-</b> | <b>+</b> |

**37** 

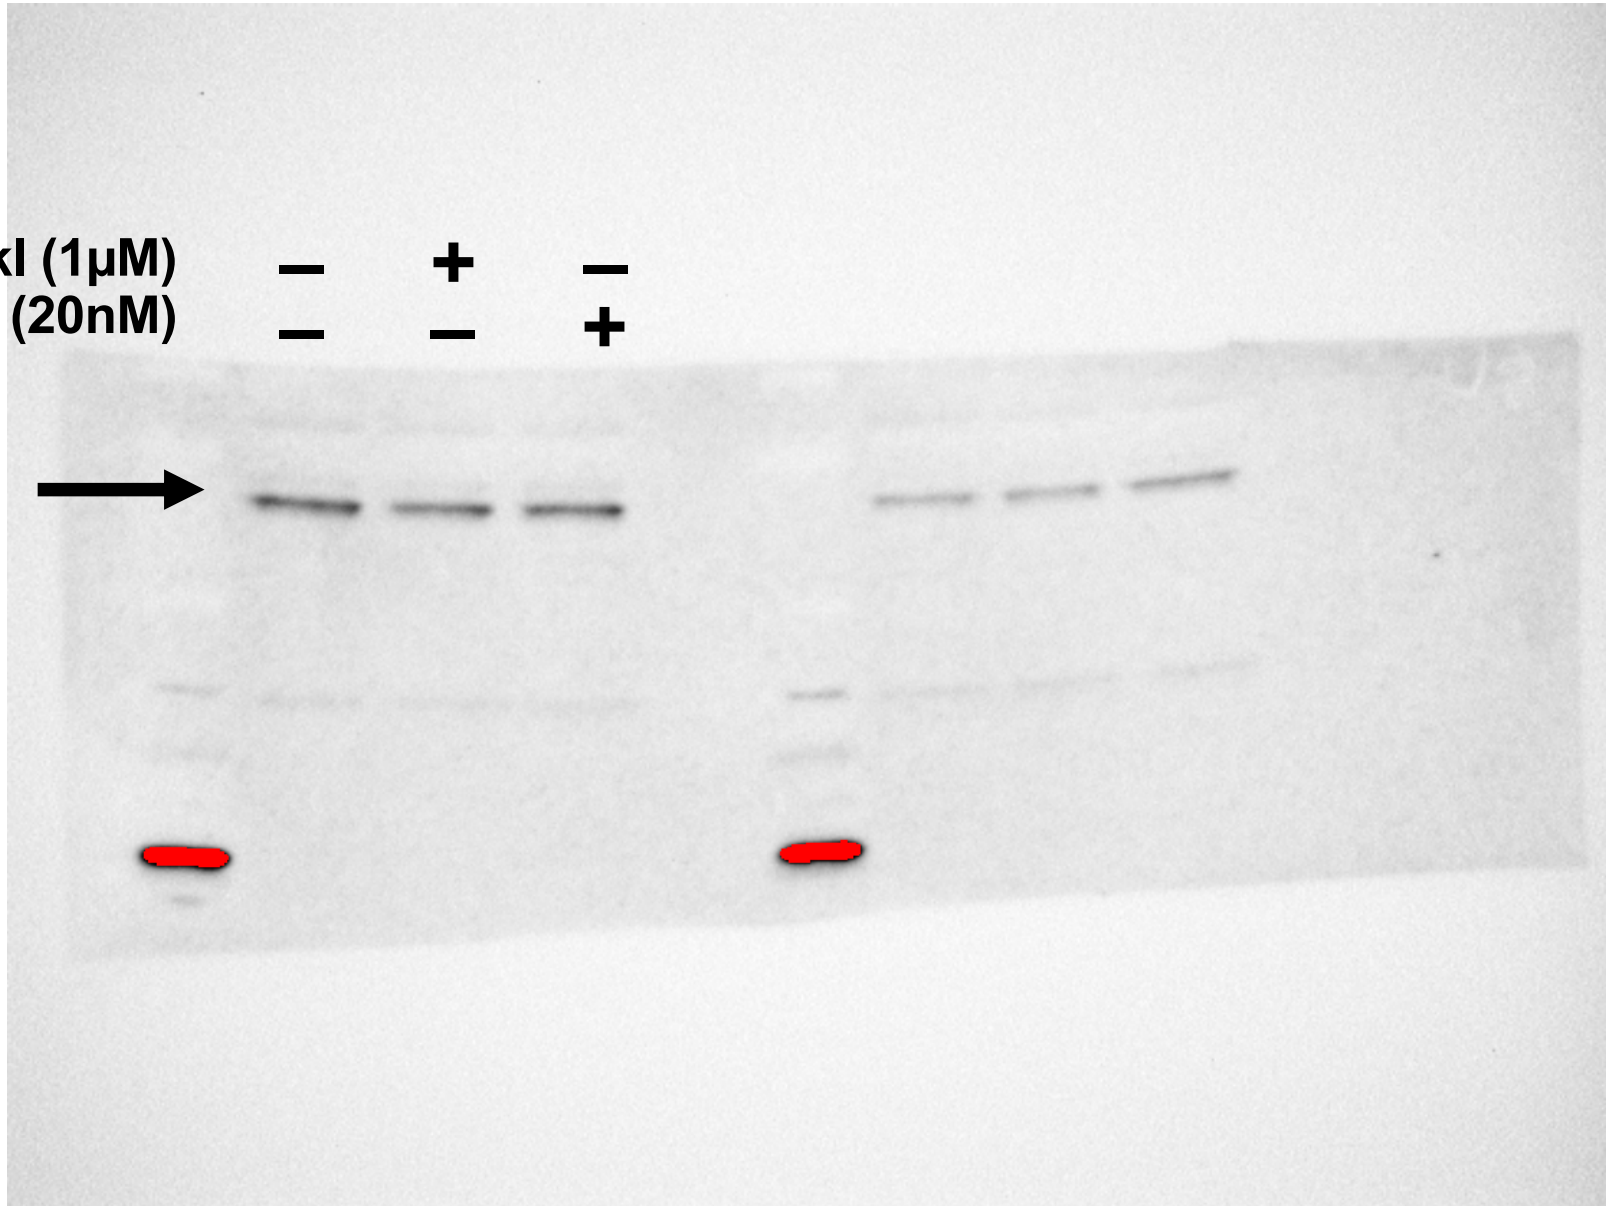

**FIGURE 2B**

pSYK

|                  |   |   |   |
|------------------|---|---|---|
| Sykl (1 $\mu$ M) | - | + | - |
| Rapamycin (20nM) | - | - | + |

72  $\longrightarrow$

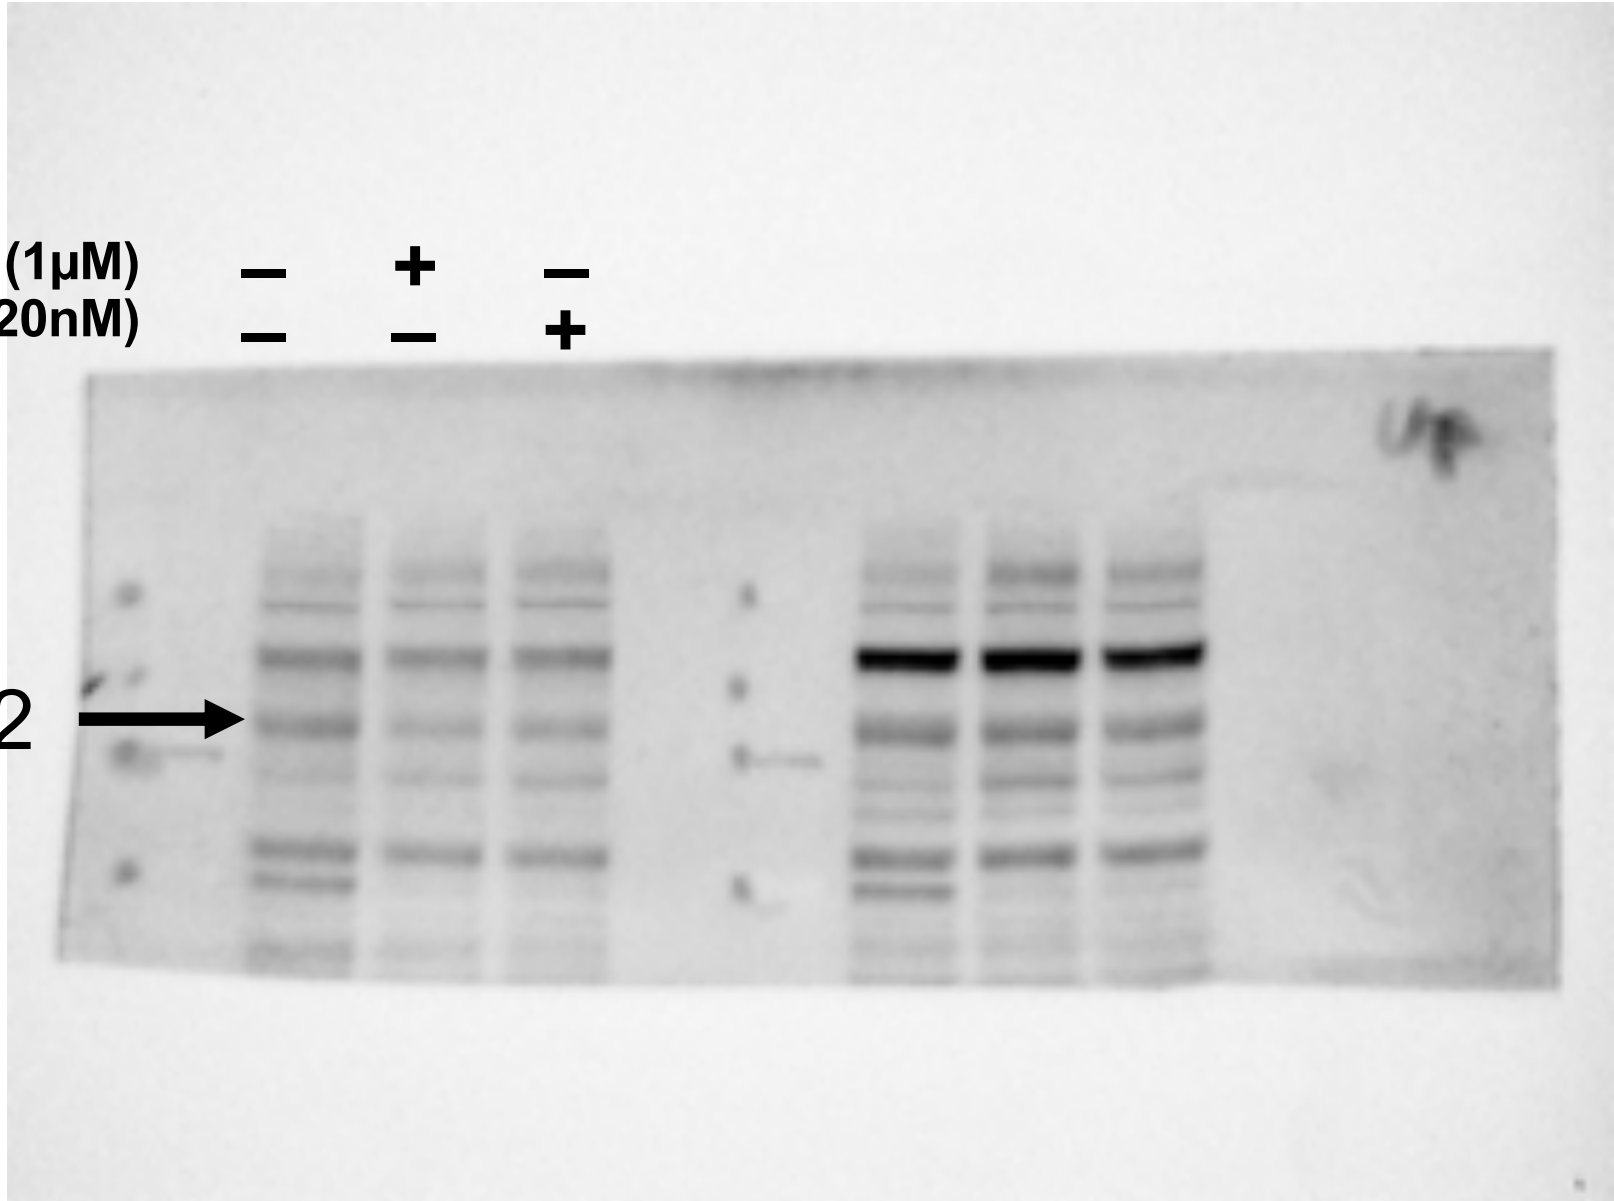



SYK

FIGURE 2B

|                  |   |   |   |
|------------------|---|---|---|
| SyKI (1 $\mu$ M) | - | + | - |
| Rapamycin (20nM) | - | - | + |

72 →

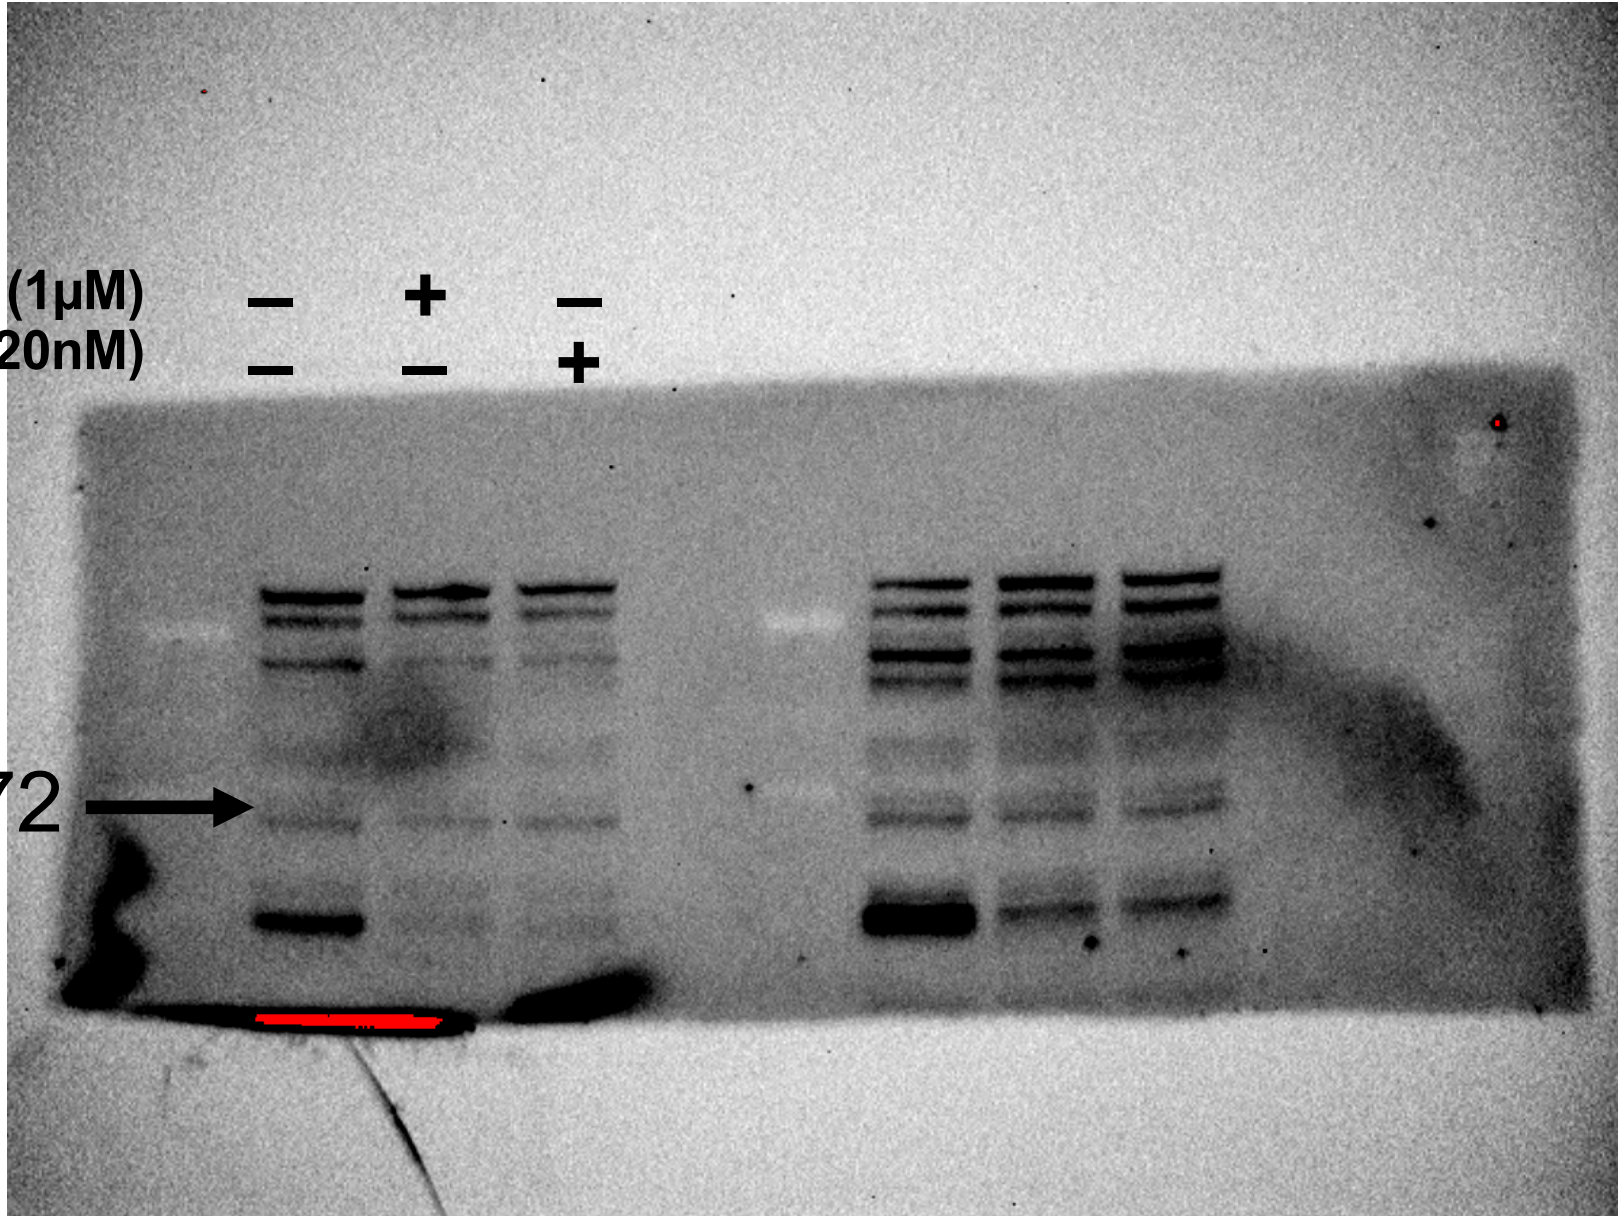

# pP70S6K **FIGURE 2B**

|                                  |          |          |          |
|----------------------------------|----------|----------|----------|
| <b>Sykl (1<math>\mu</math>M)</b> | <b>-</b> | <b>+</b> | <b>-</b> |
| <b>Rapamycin (20nM)</b>          | <b>-</b> | <b>-</b> | <b>+</b> |

**70** **→**

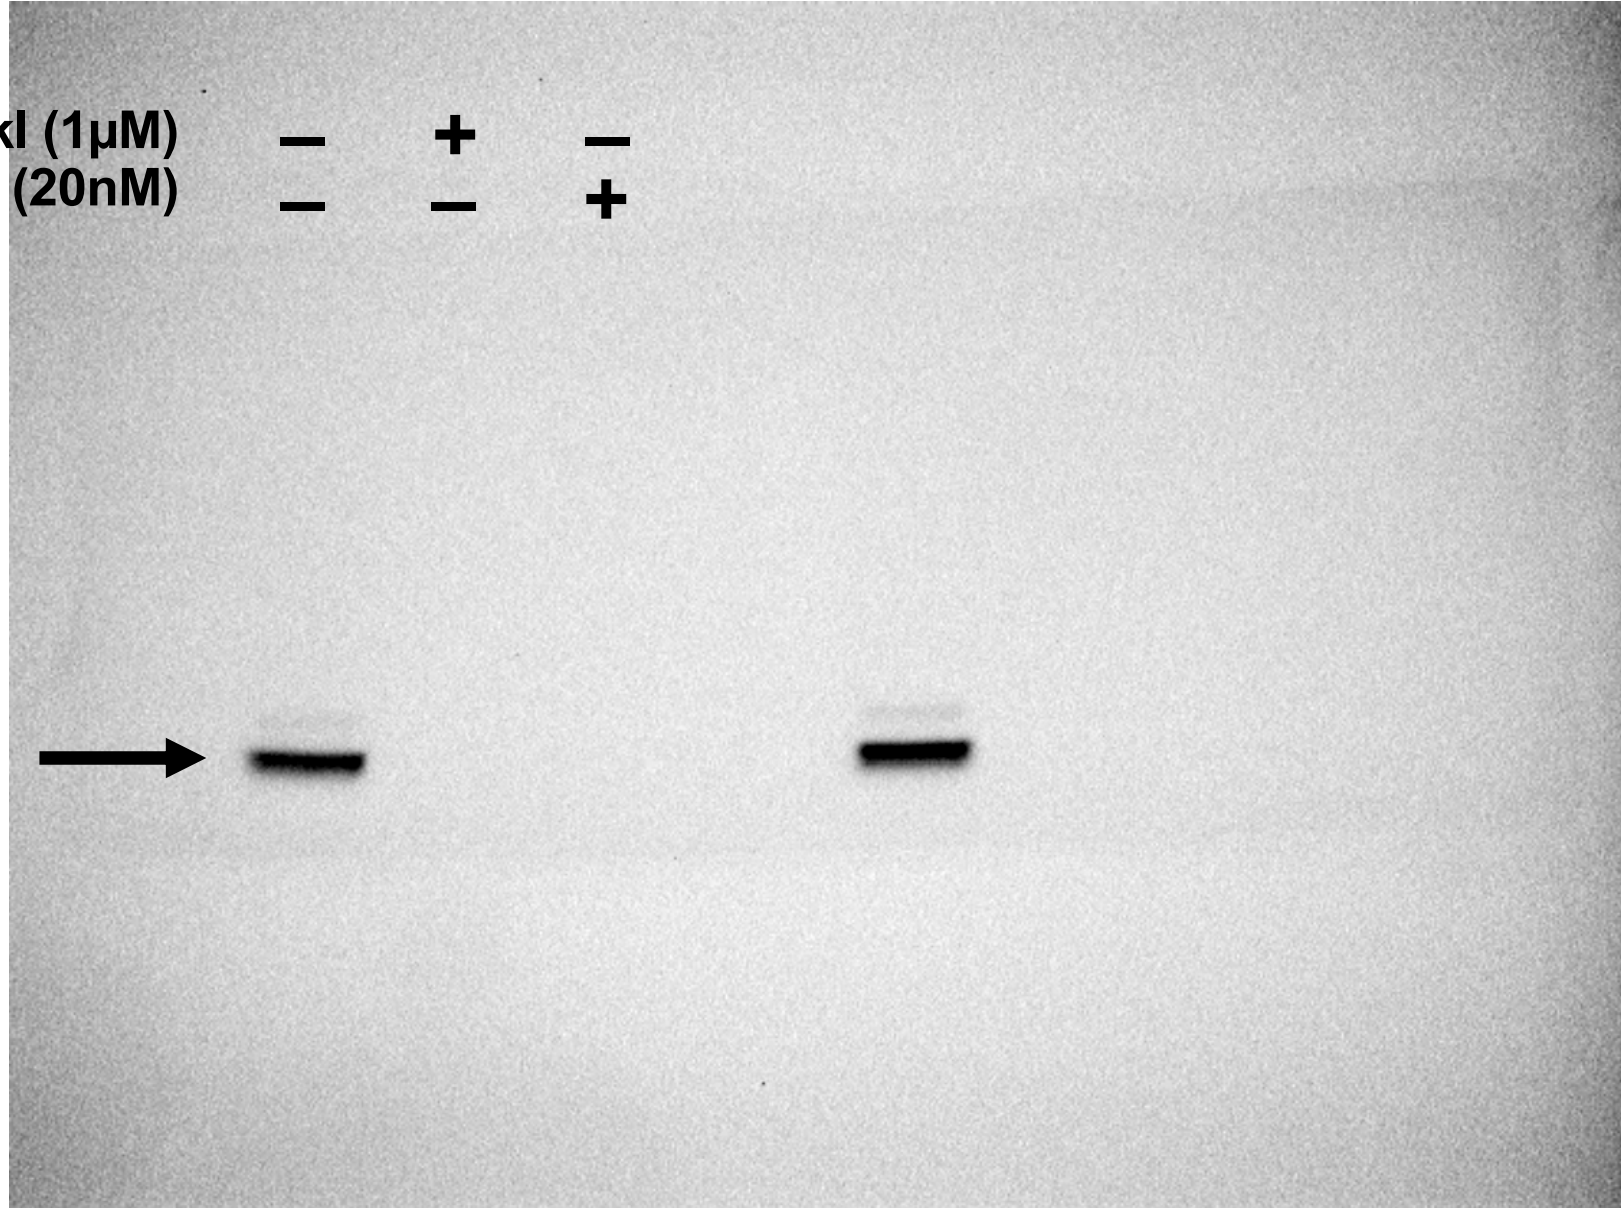

**FIGURE 2B**

**P70S6K**

|                                  |          |          |          |
|----------------------------------|----------|----------|----------|
| <b>Sykl (1<math>\mu</math>M)</b> | <b>-</b> | <b>+</b> | <b>-</b> |
| <b>Rapamycin (20nM)</b>          | <b>-</b> | <b>-</b> | <b>+</b> |

**70**

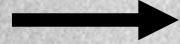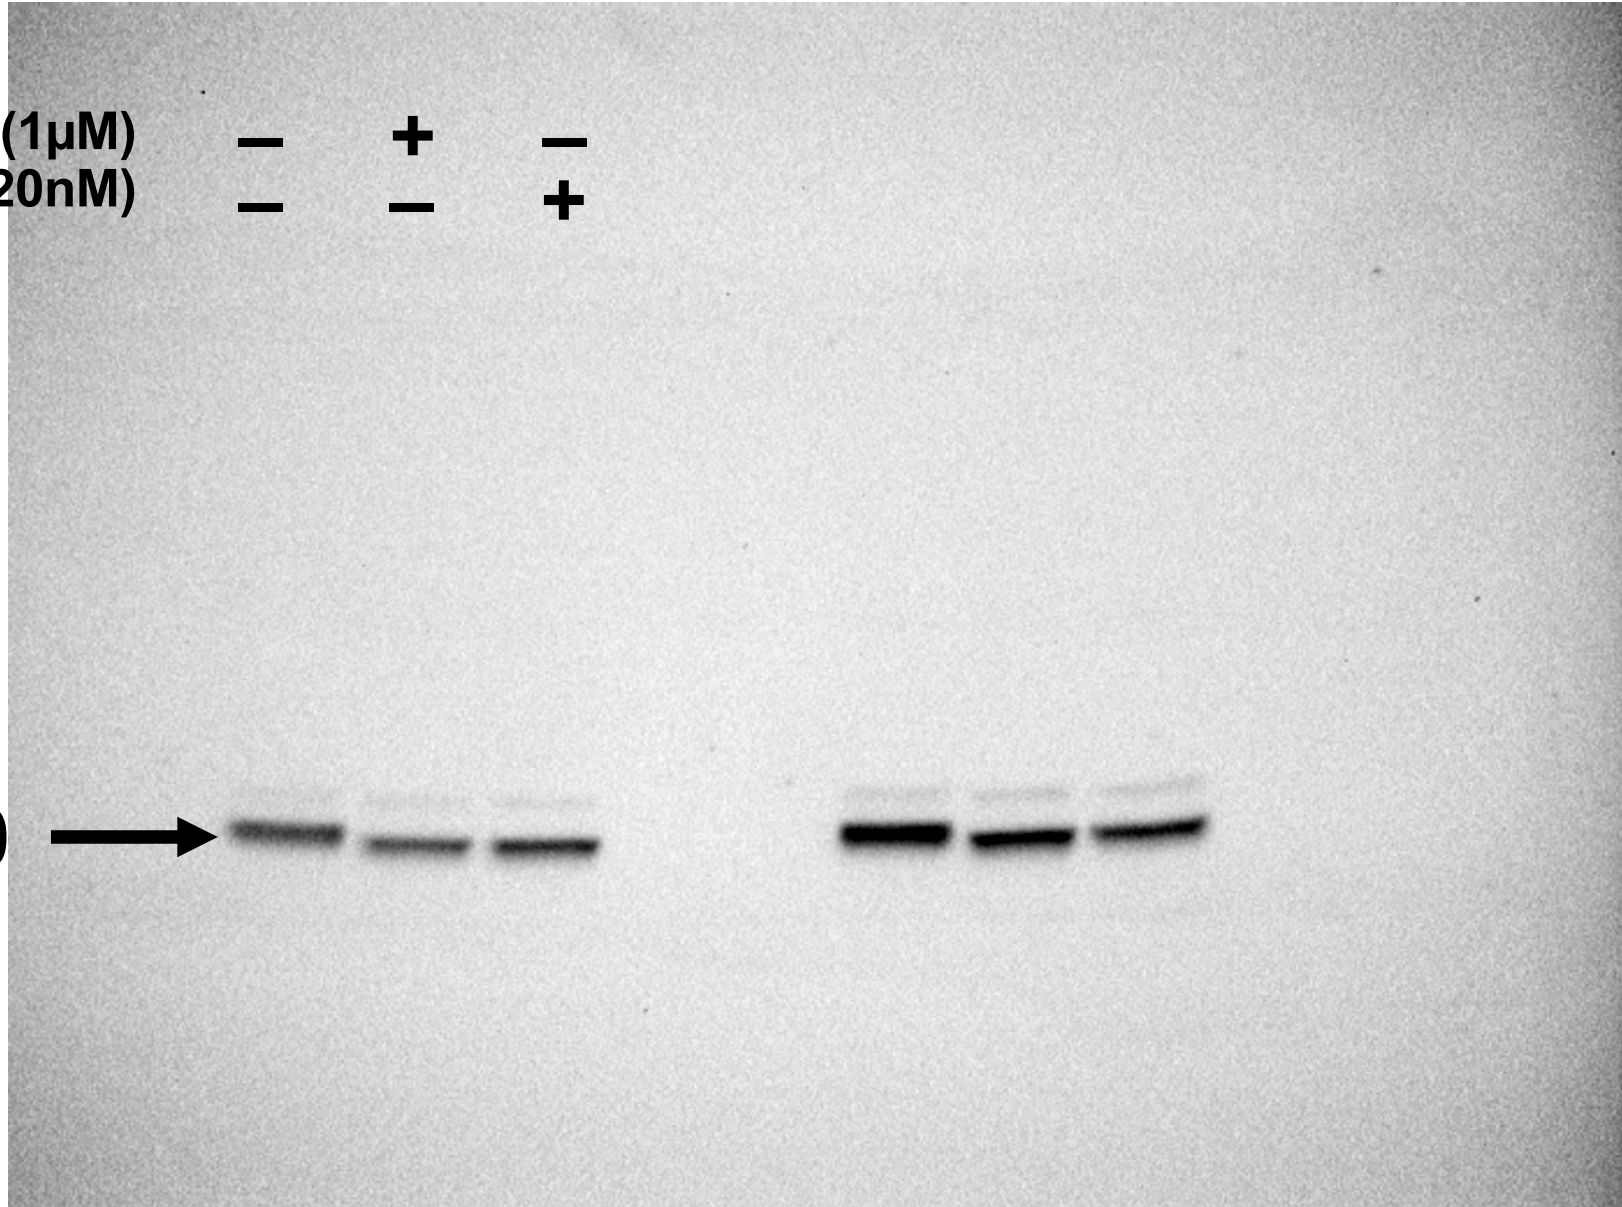



**FIGURE 2B**

**BACTIN**

|                                  |          |          |          |
|----------------------------------|----------|----------|----------|
| <b>Sykl (1<math>\mu</math>M)</b> | <b>-</b> | <b>+</b> | <b>-</b> |
| <b>Rapamycin (20nM)</b>          | <b>-</b> | <b>-</b> | <b>+</b> |

42

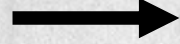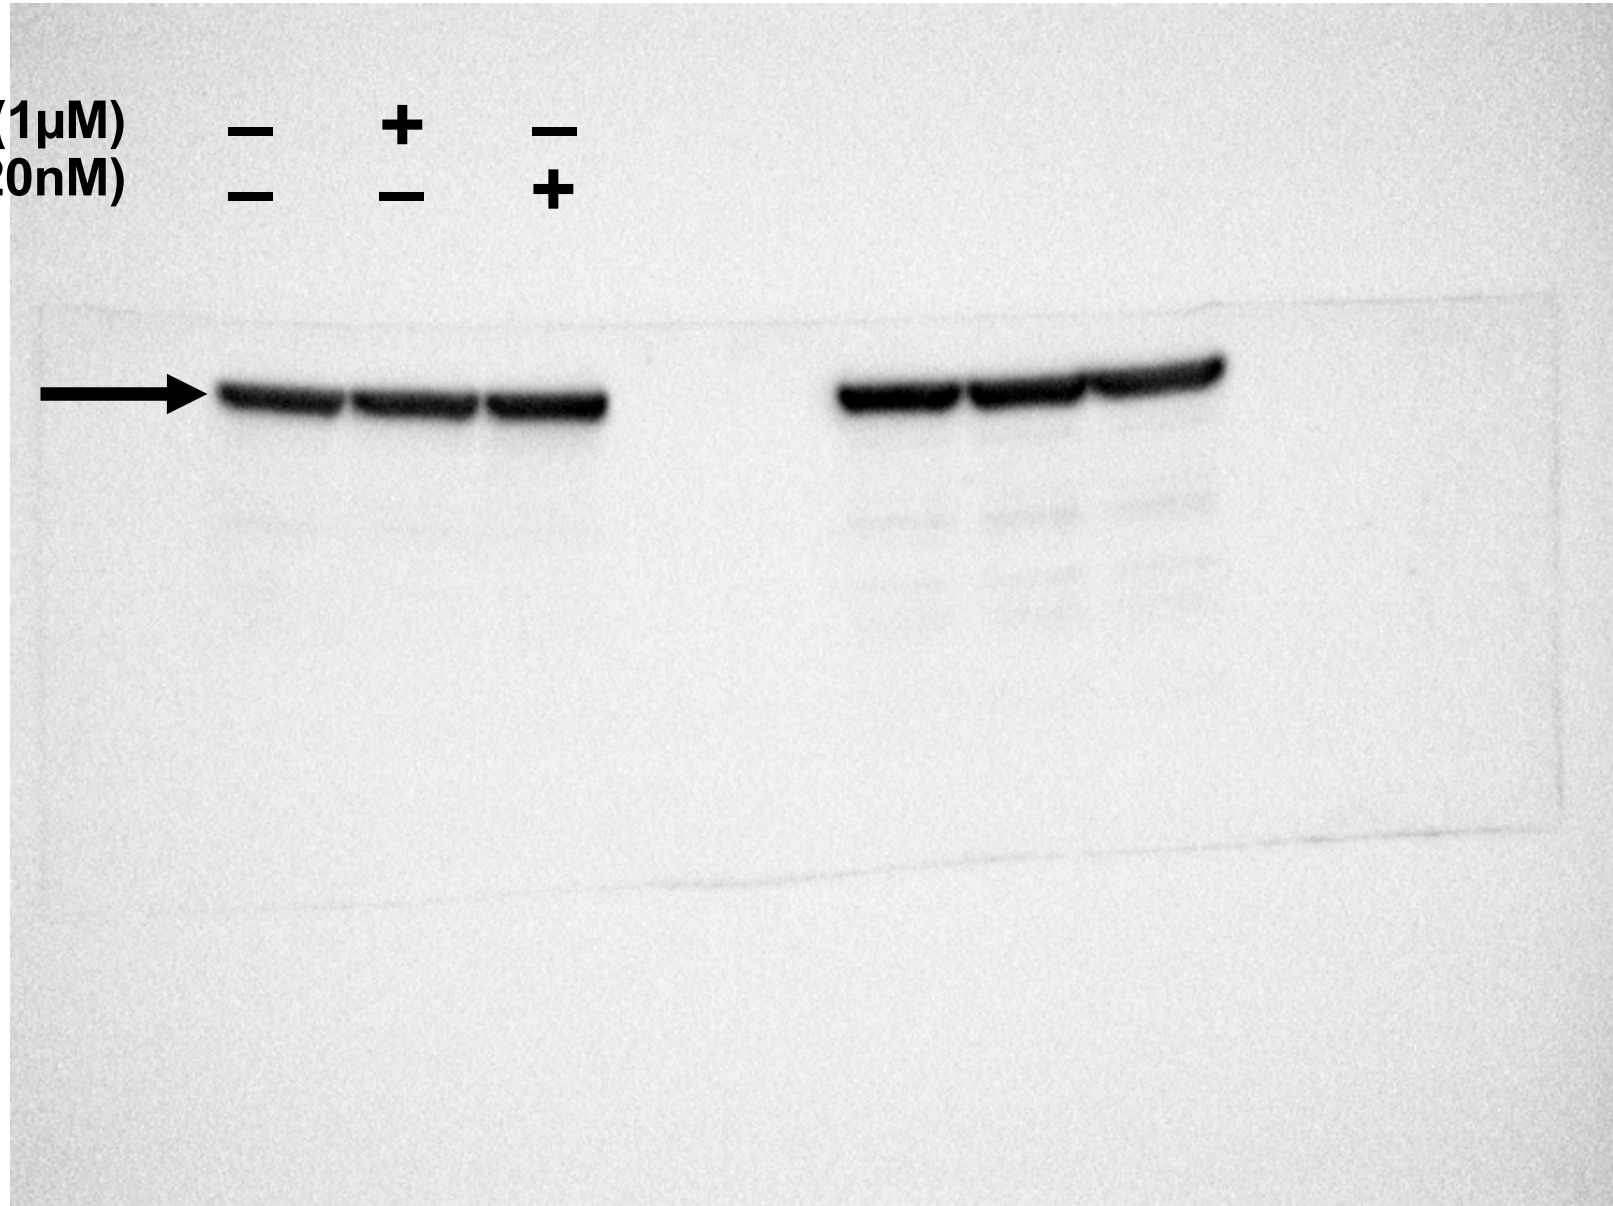

# ETV2

## FIGURE 2D

|                  | T | N | T | N |
|------------------|---|---|---|---|
| Sykl (1 $\mu$ M) | - | - | + | + |
| Rapamycin (20nM) | - | - | - | - |

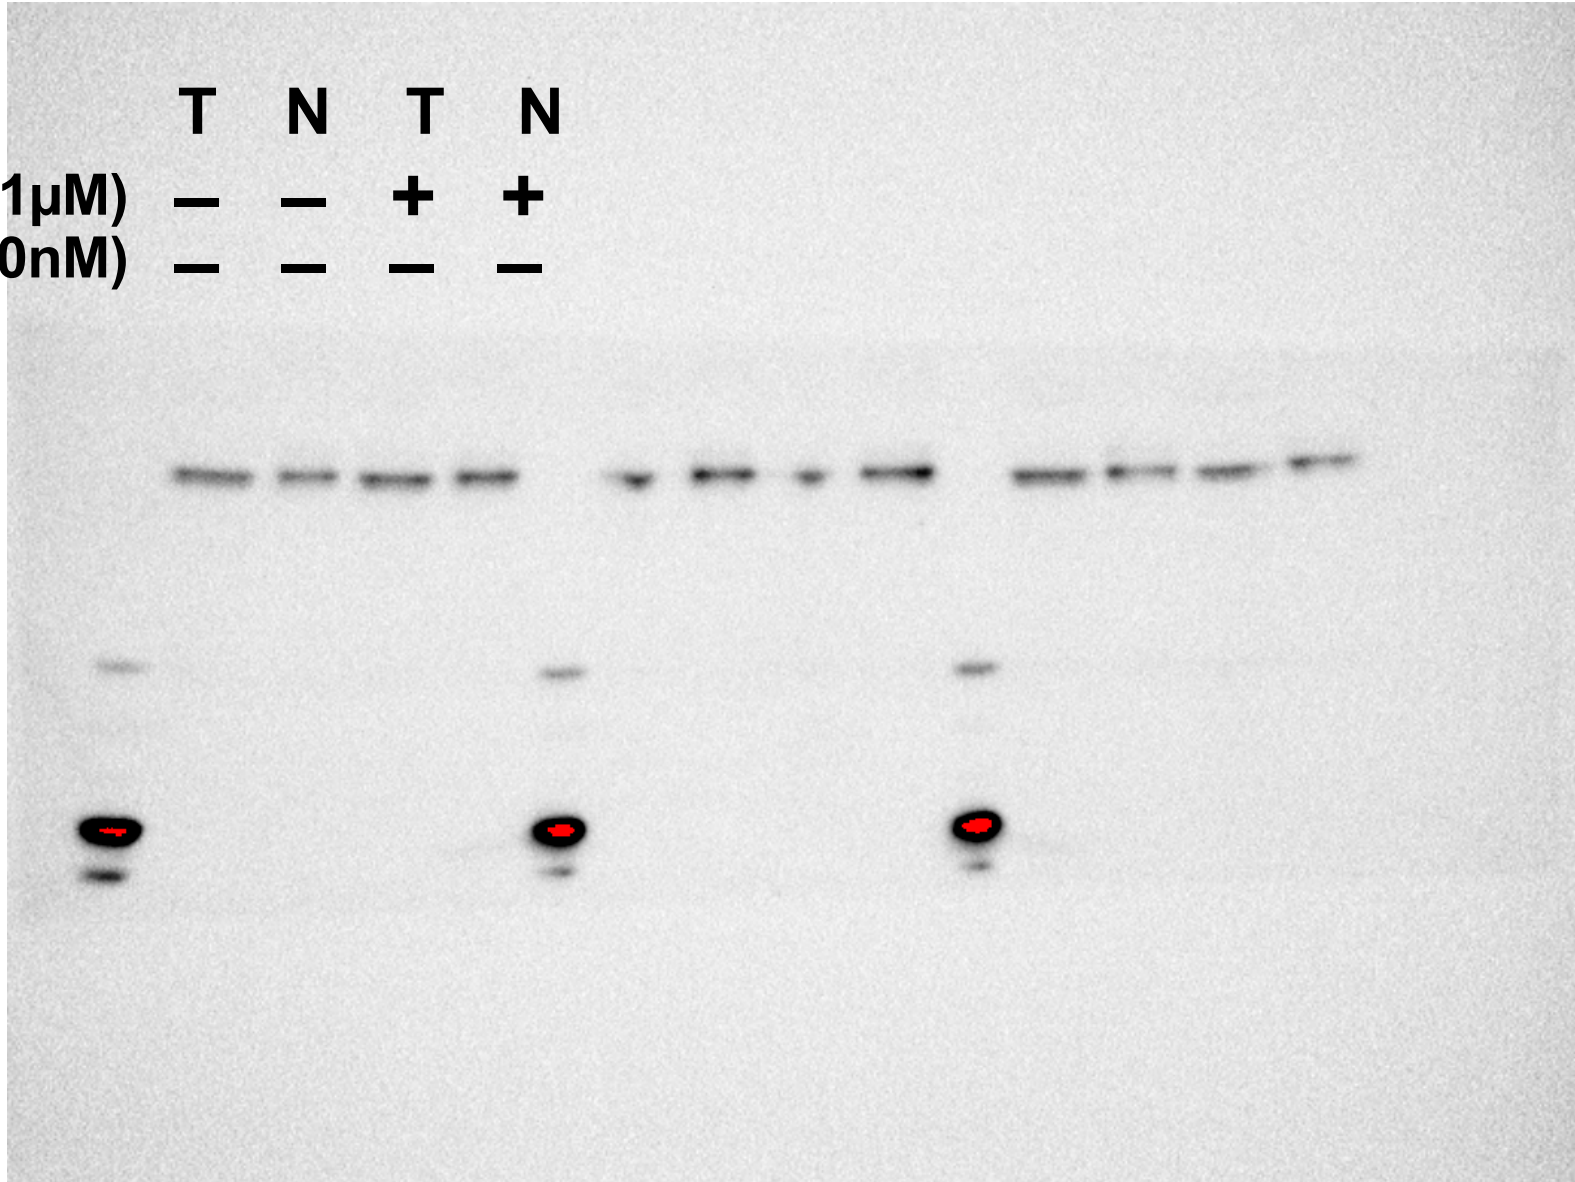

# PARP

## FIGURE 2D

|                  | T | N | T | N |
|------------------|---|---|---|---|
| Sykl (1 $\mu$ M) | - | - | + | + |
| Rapamycin (20nM) | - | - | - | - |

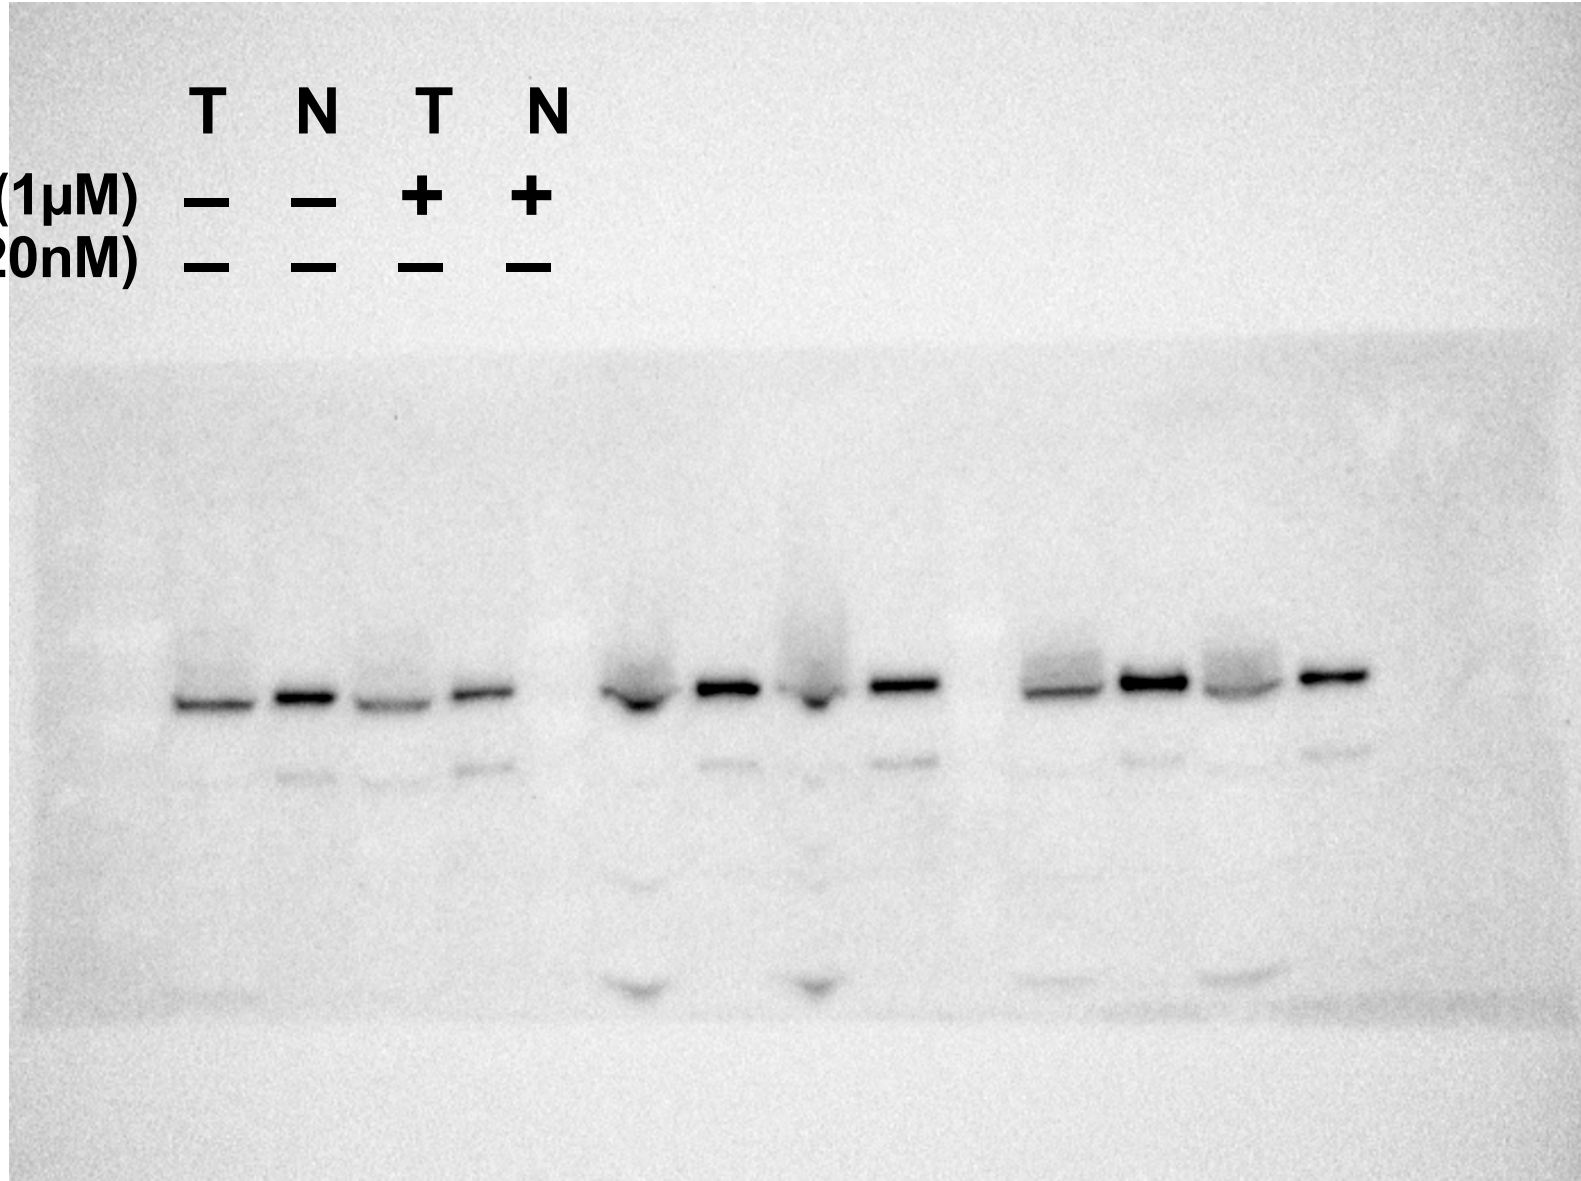



# GAPDH

## FIGURE 2D

|                  | T | N | T | N |
|------------------|---|---|---|---|
| Sykl (1 $\mu$ M) | - | - | + | + |
| Rapamycin (20nM) | - | - | - | - |

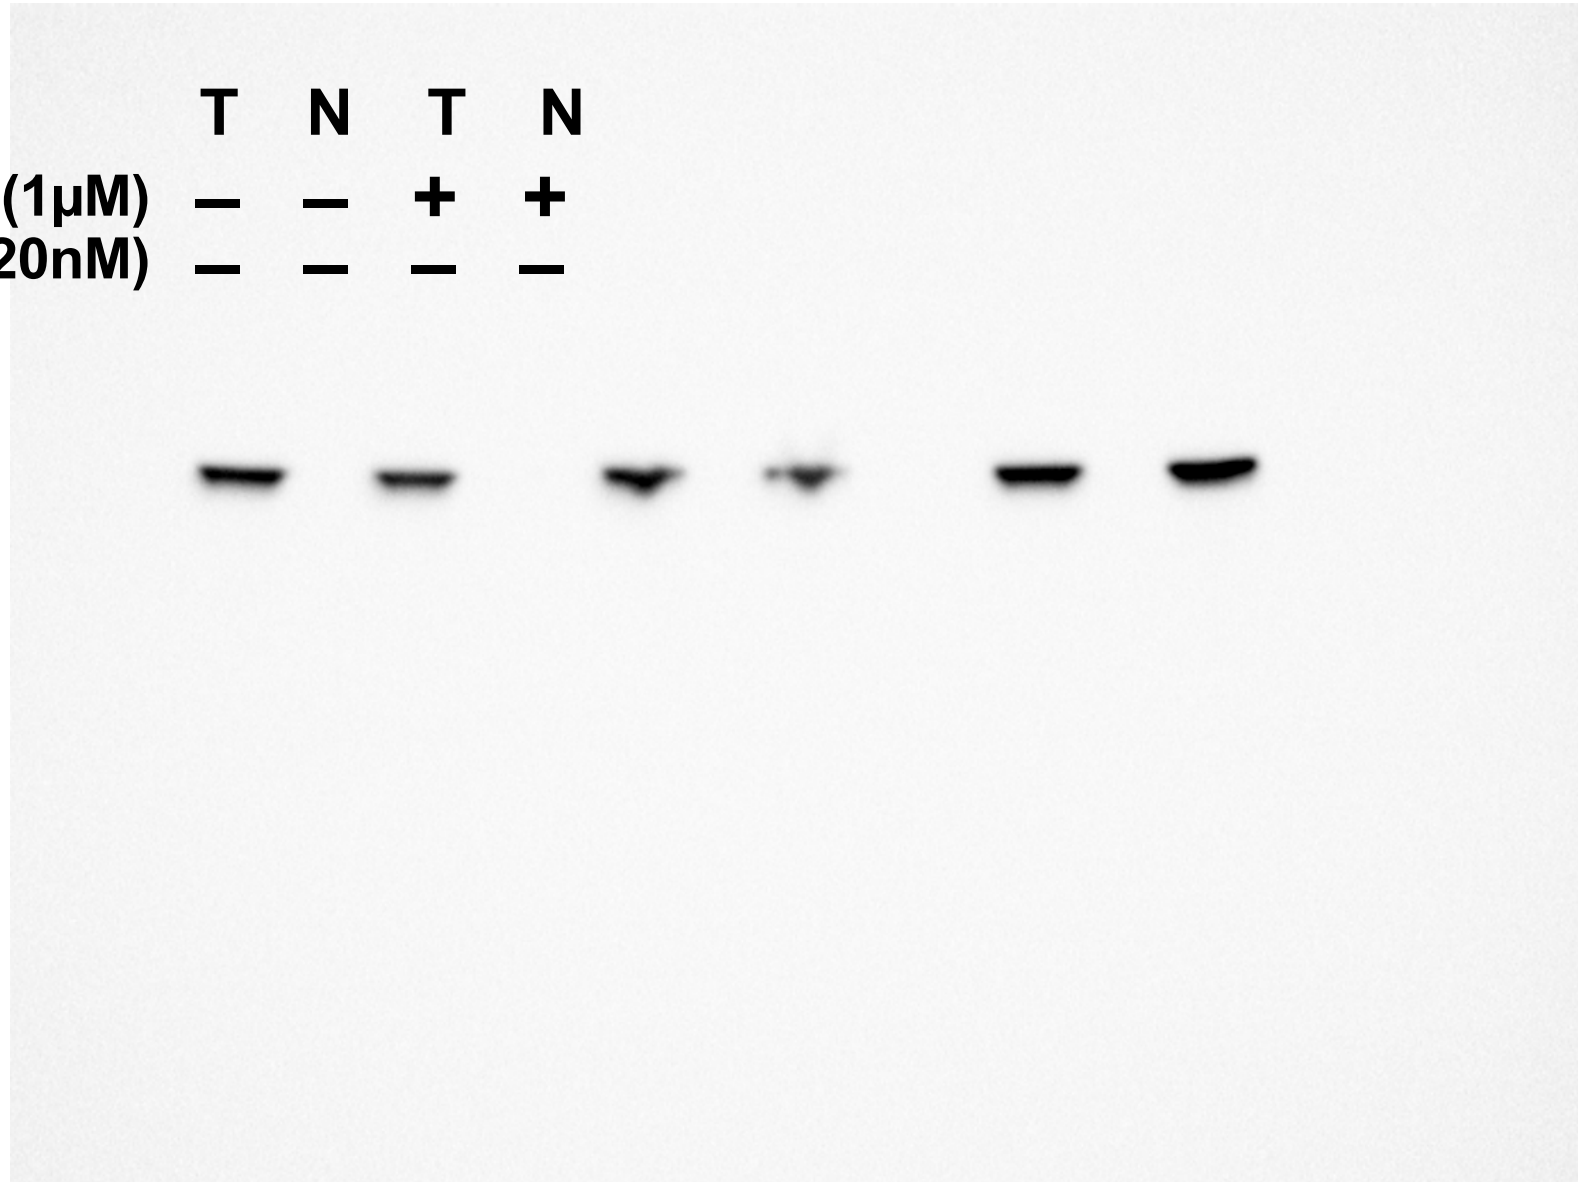

**FIGURE 2D**

**ETV2**

**T N T N**

**Sykl (1 $\mu$ M)**

**- - - -**

**Rapamycin (20nM)**

**- - + +**

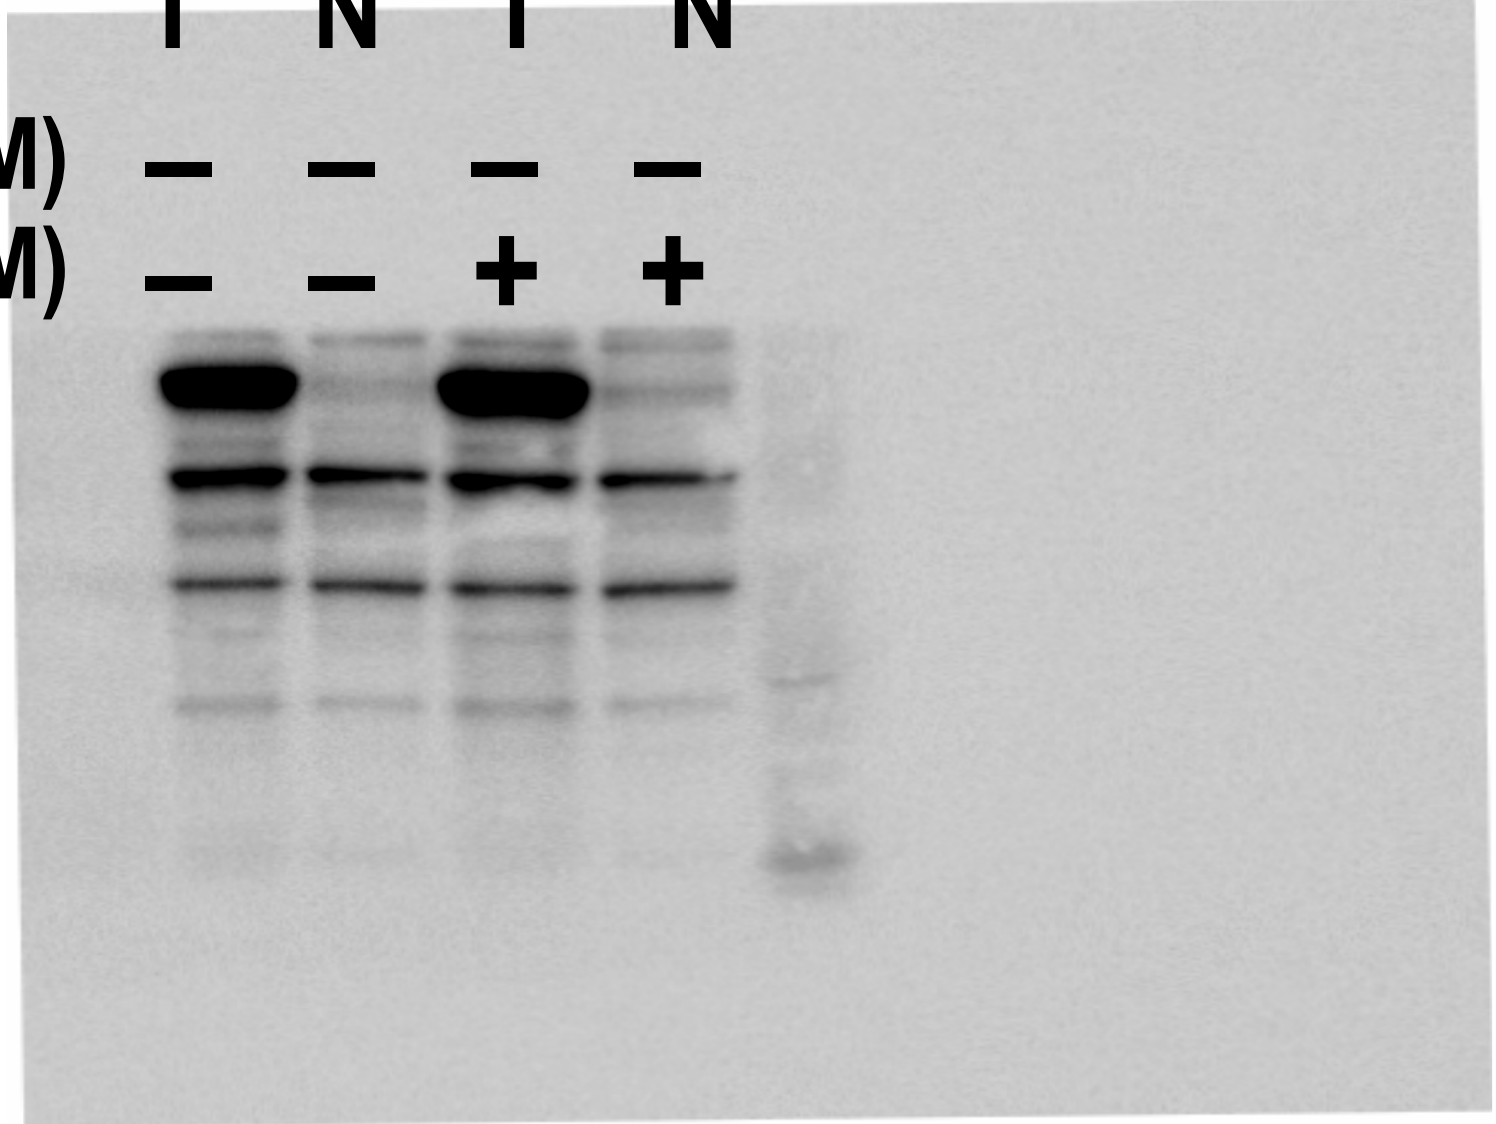

**PARP**

**FIGURE 2D**

**T N T N**

**Sykl (1 $\mu$ M)**

**- - - -**

**Rapamycin (20nM)**

**- - + +**

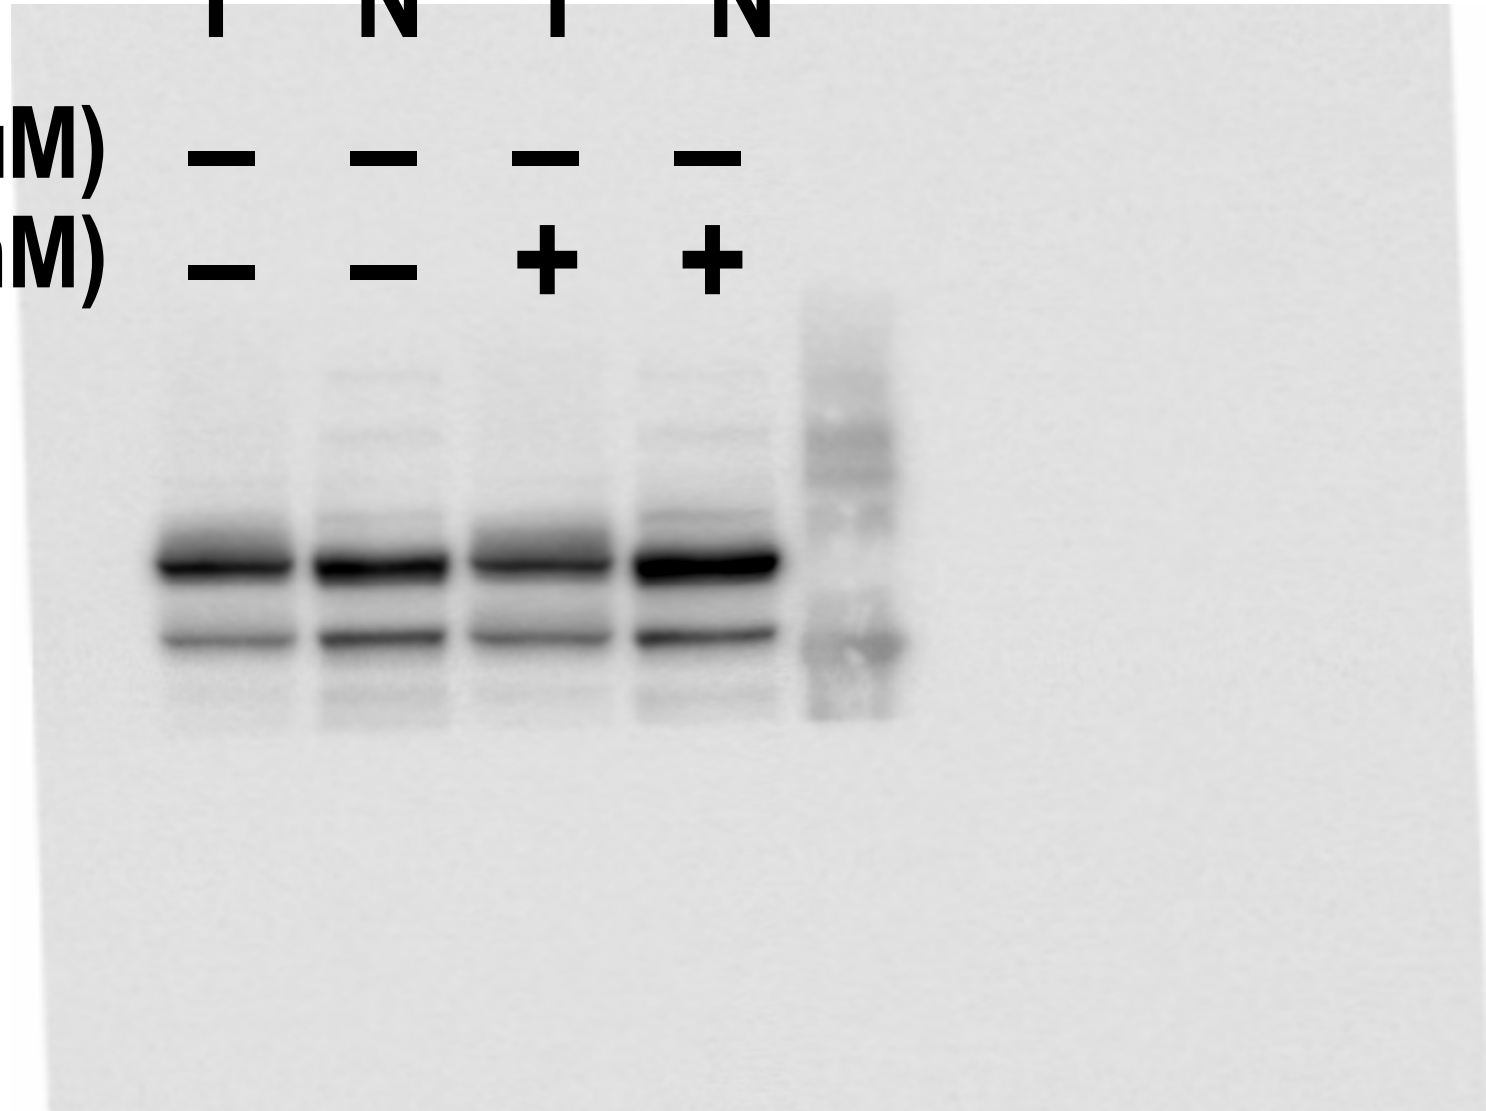

**FIGURE 2D**

**GAPDH**

**T N T N**

**Sykl (1 $\mu$ M)**

**- - - -**

**Rapamycin (20nM)**

**- - + +**

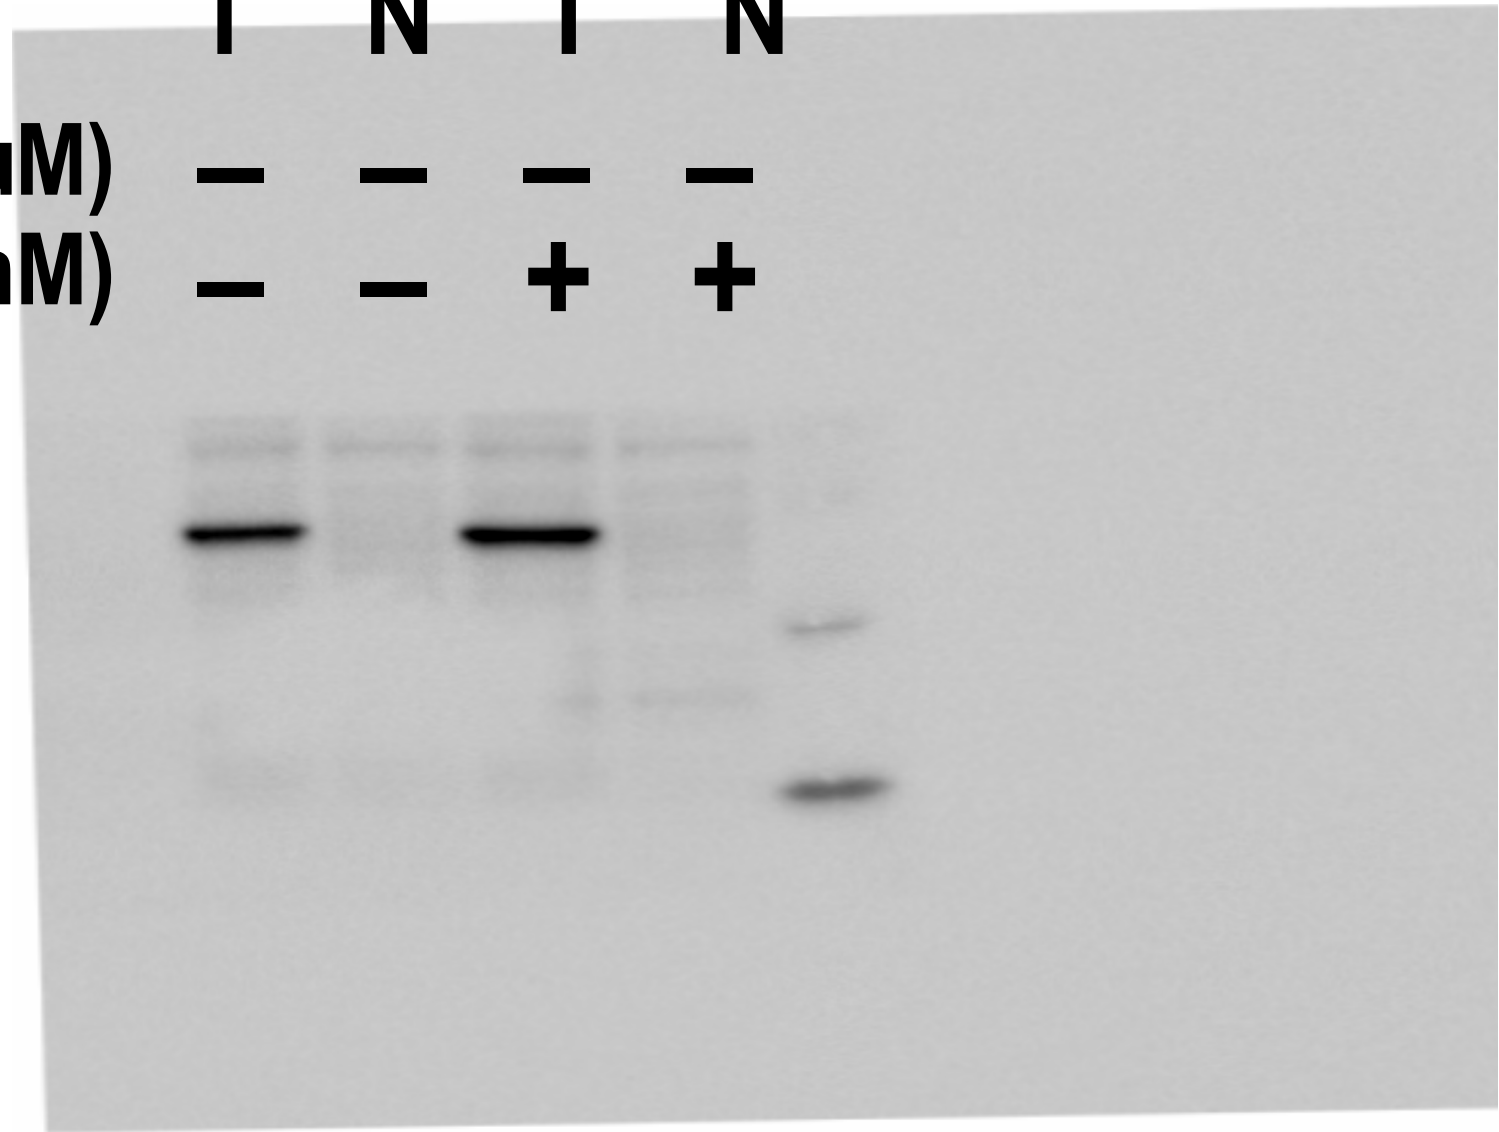

**FIGURE 3B**

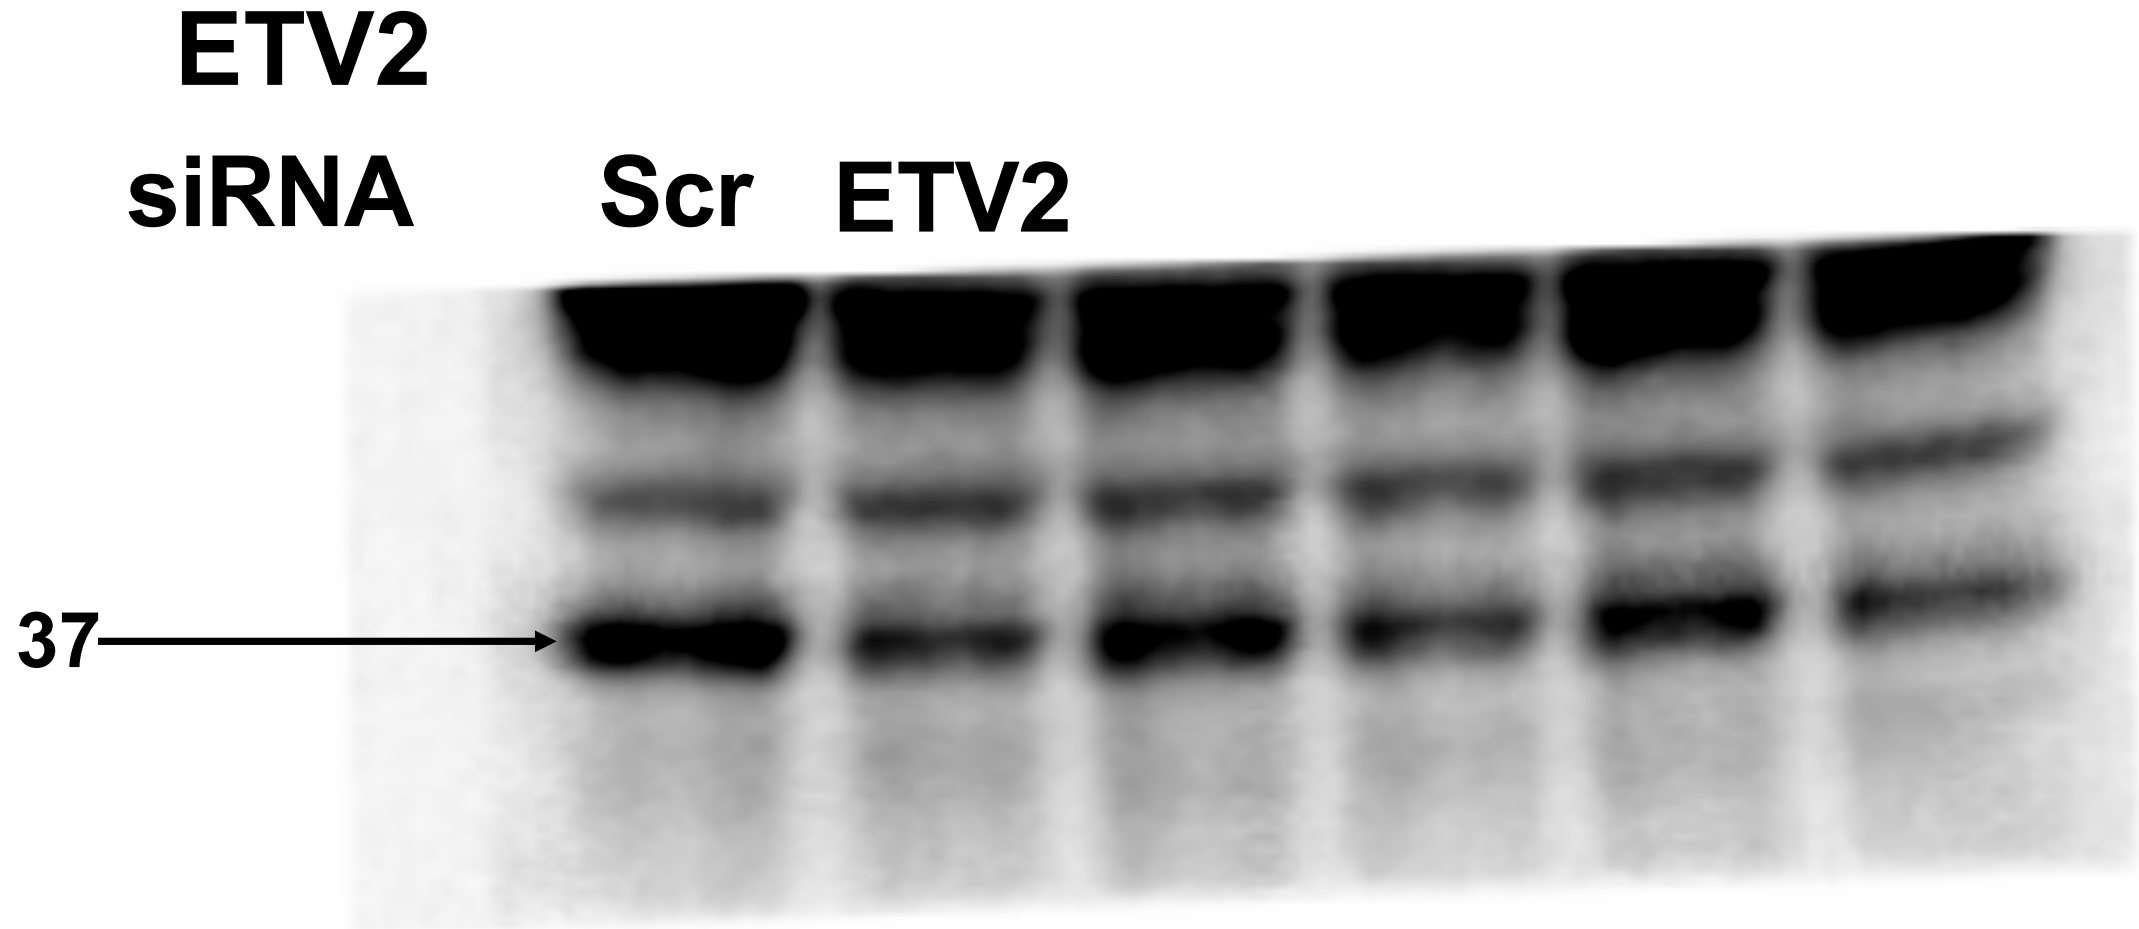

**FIGURE 3B**

**BACTIN**

**siRNA**

**Scr ETV2**

**42**

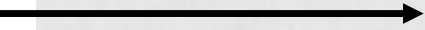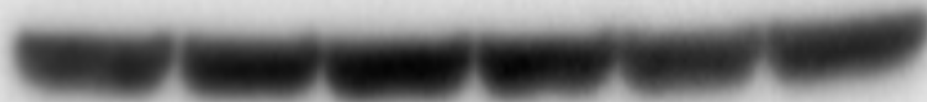



**CHOP**

**FIGURE 3G**

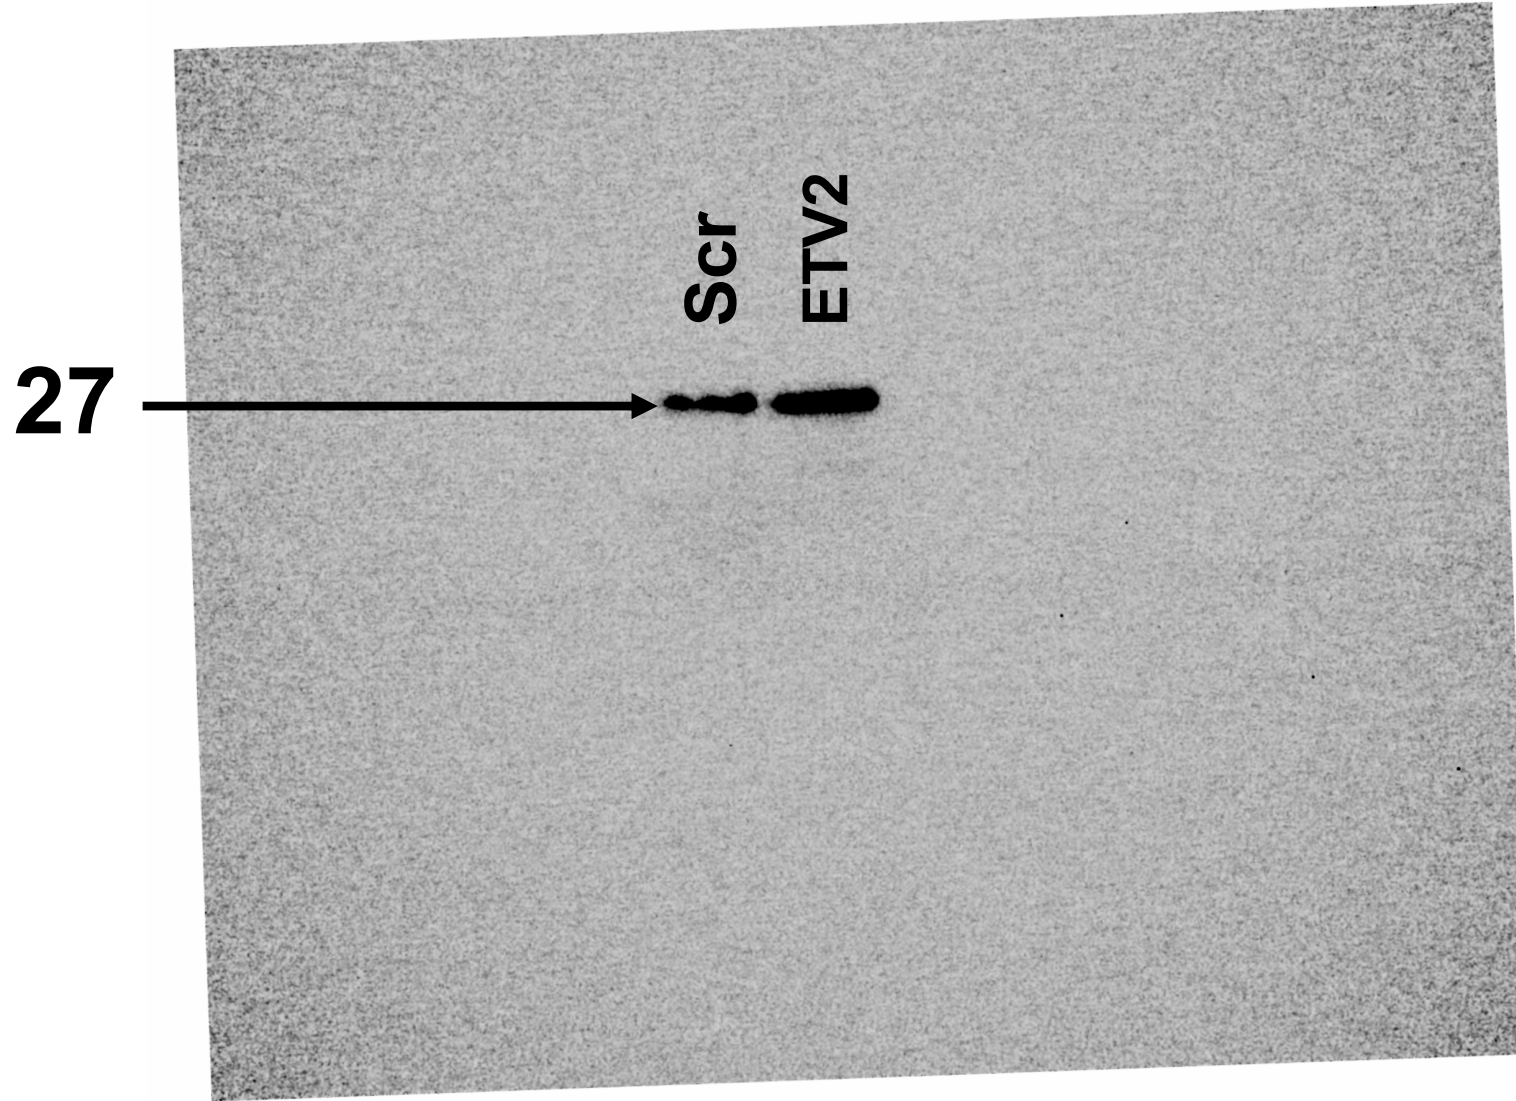

**FIGURE 3G**

**pEIF-alpha**

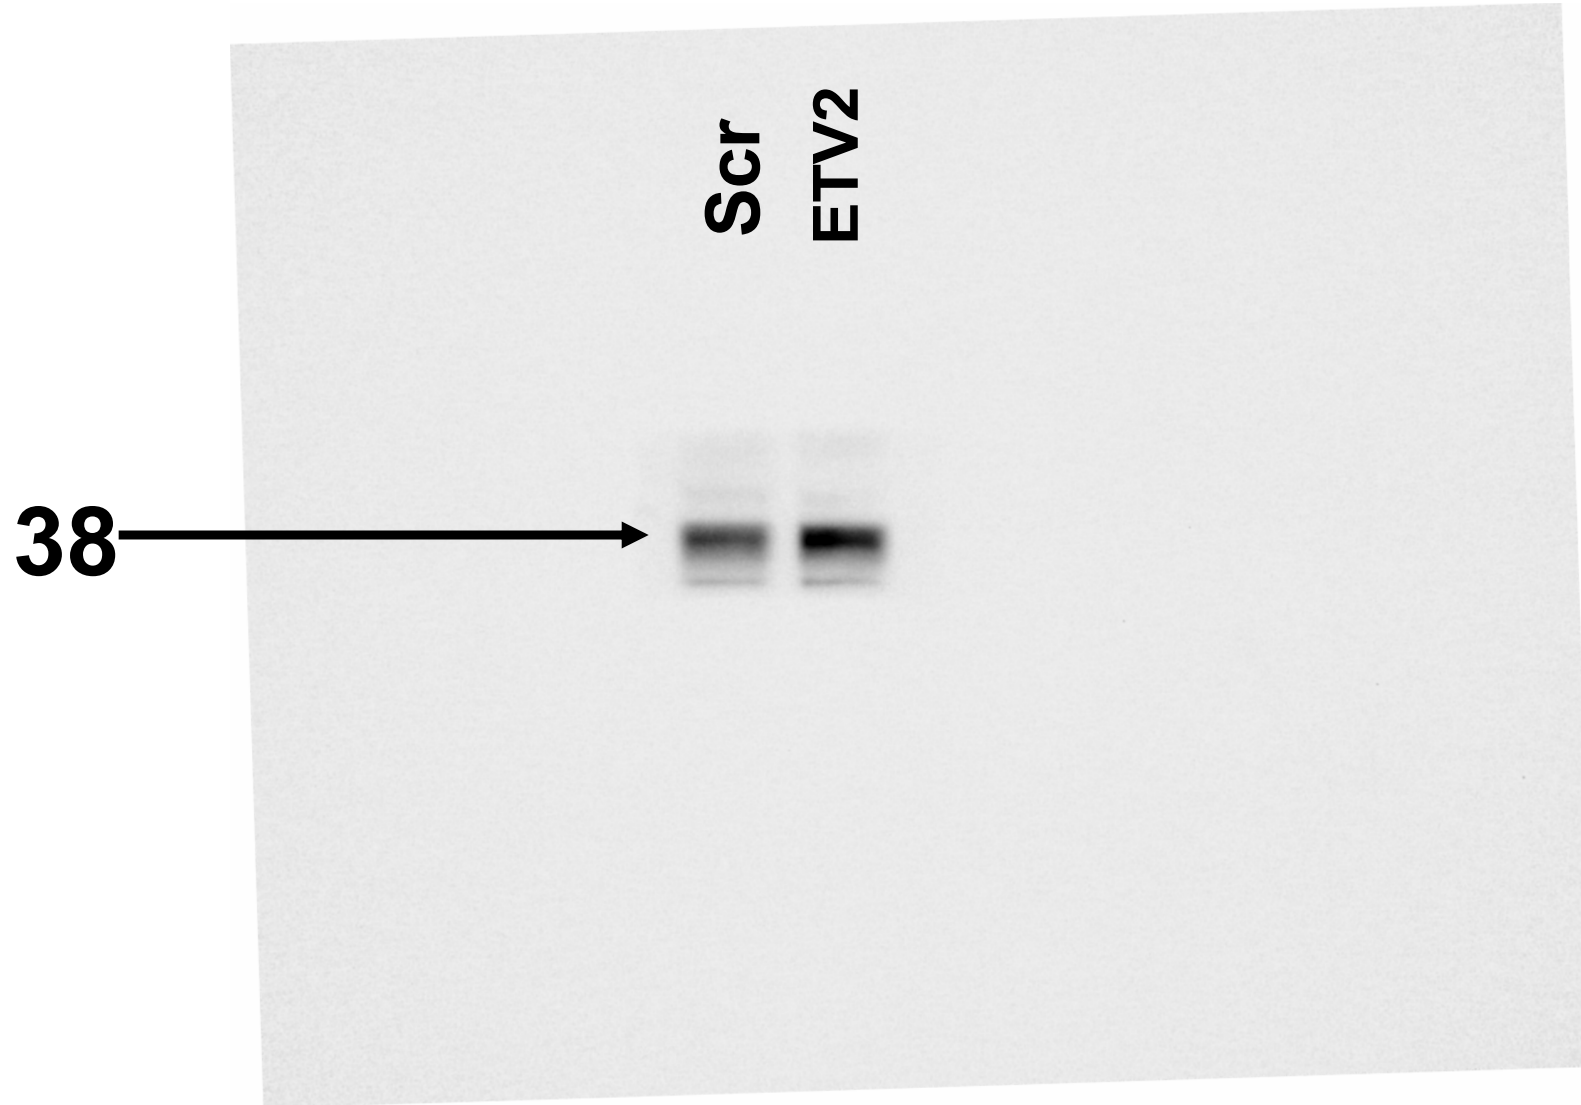

**FIGURE 3G**

**EIF-alpha**

**38**

**Scr**  
**ETV2**

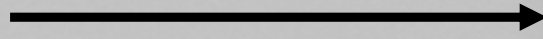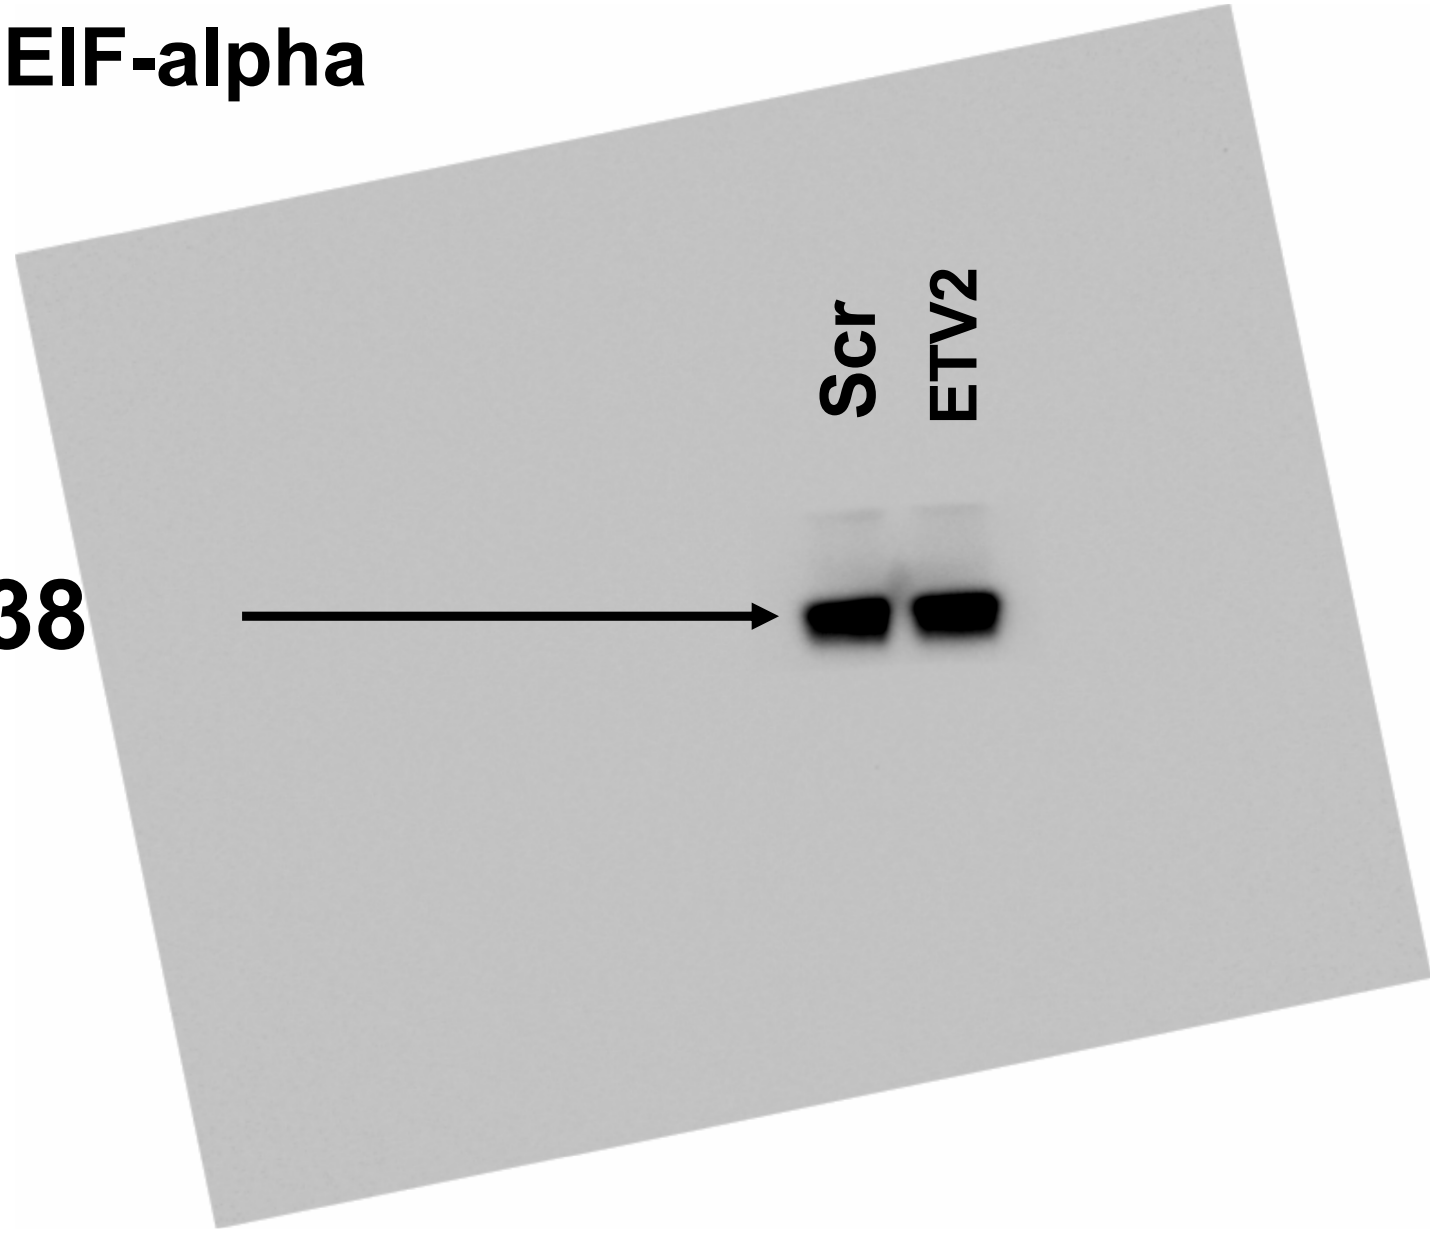

**FIGURE 3G**

**cPARP**

**89**

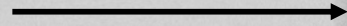

**Scr**  
**ETV2**

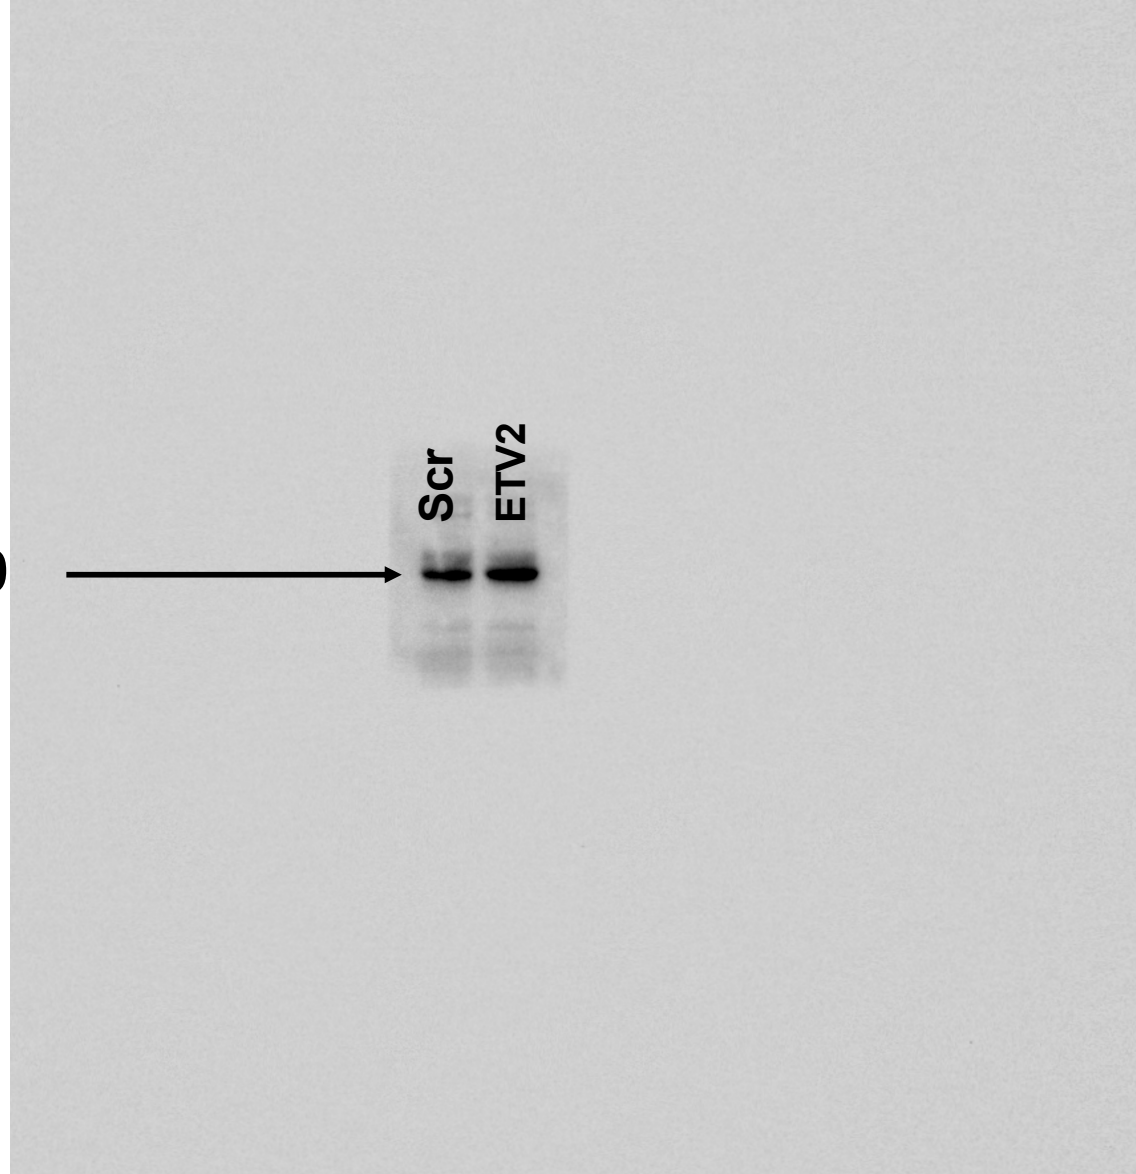

**FIGURE 3G**

**PARP**

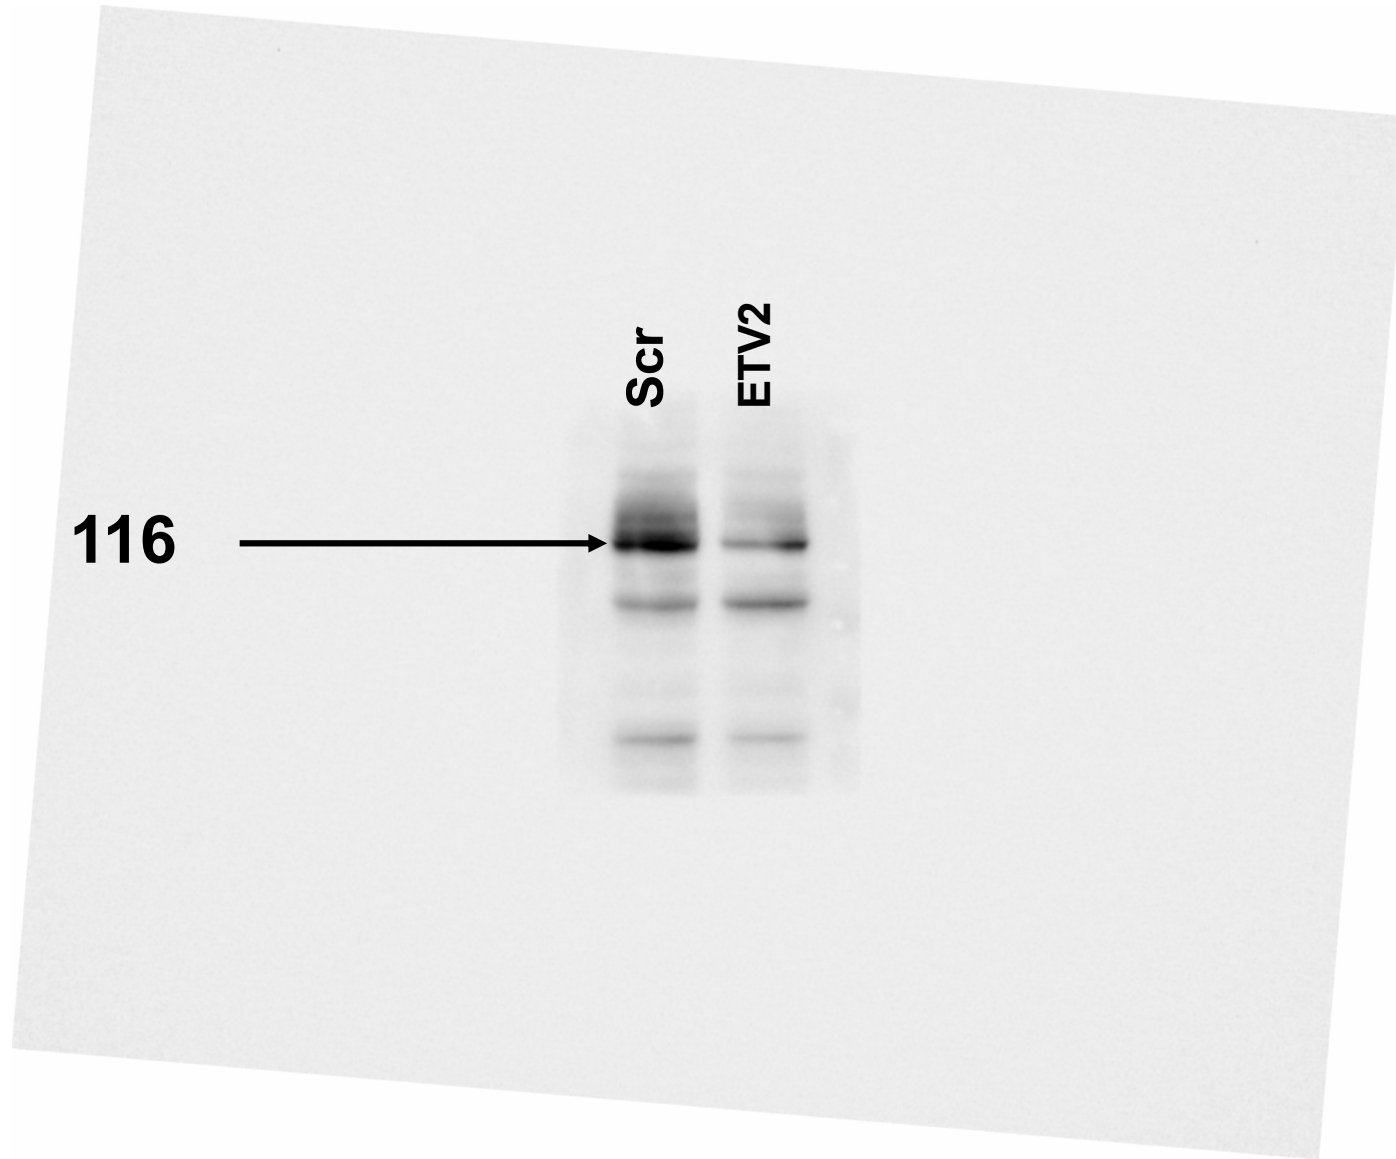

**FIGURE 3G**

**BACTIN**

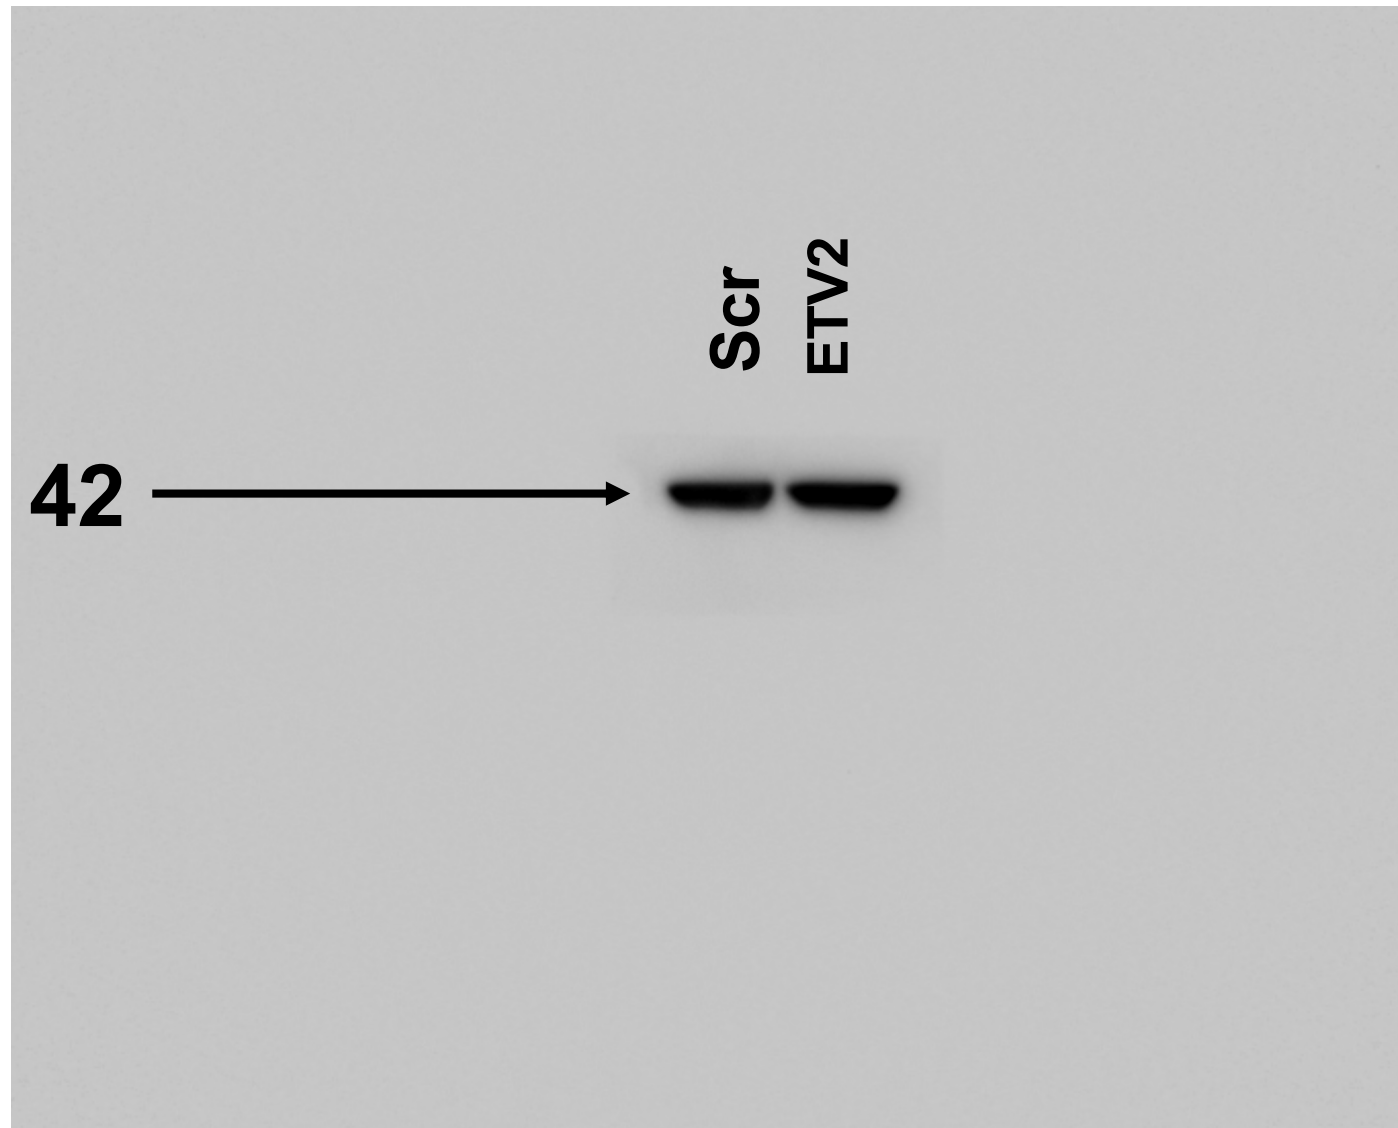



FIGURE 4D

PARPBP

Scr

PARPBP

32

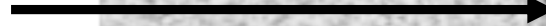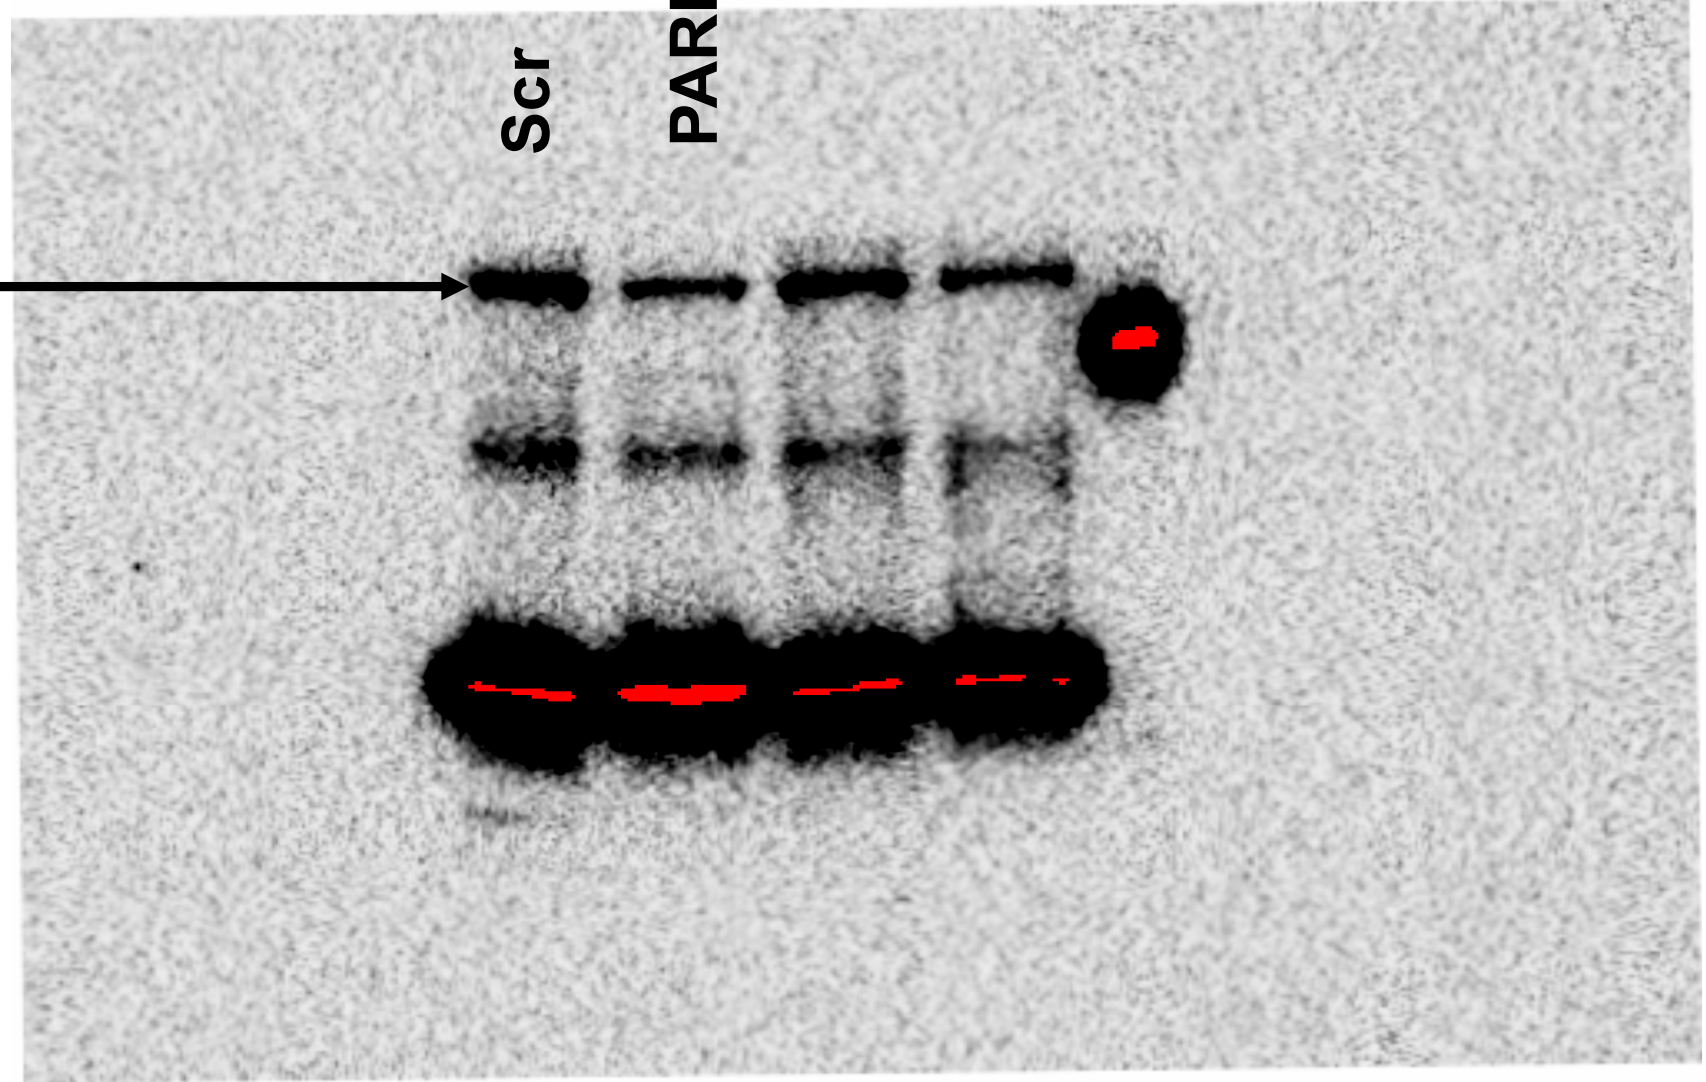

**FIGURE 4D**

**BACTIN**

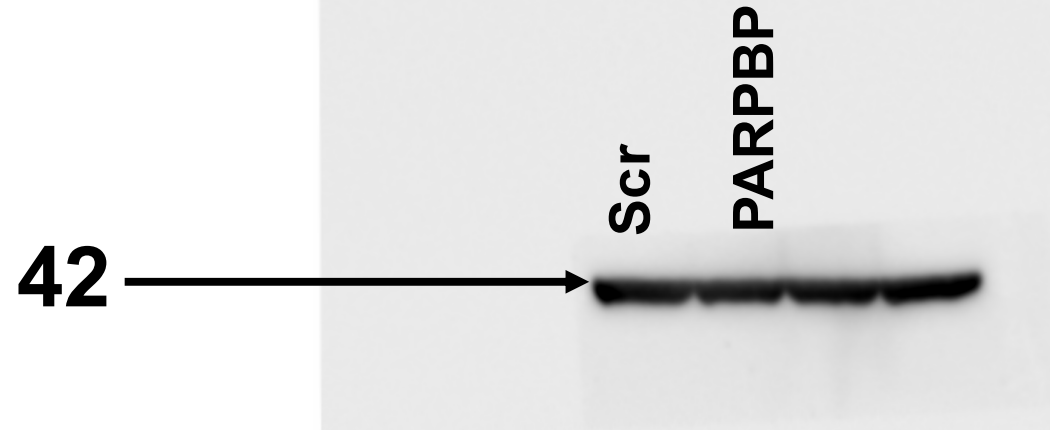

**FIGURE 4F**

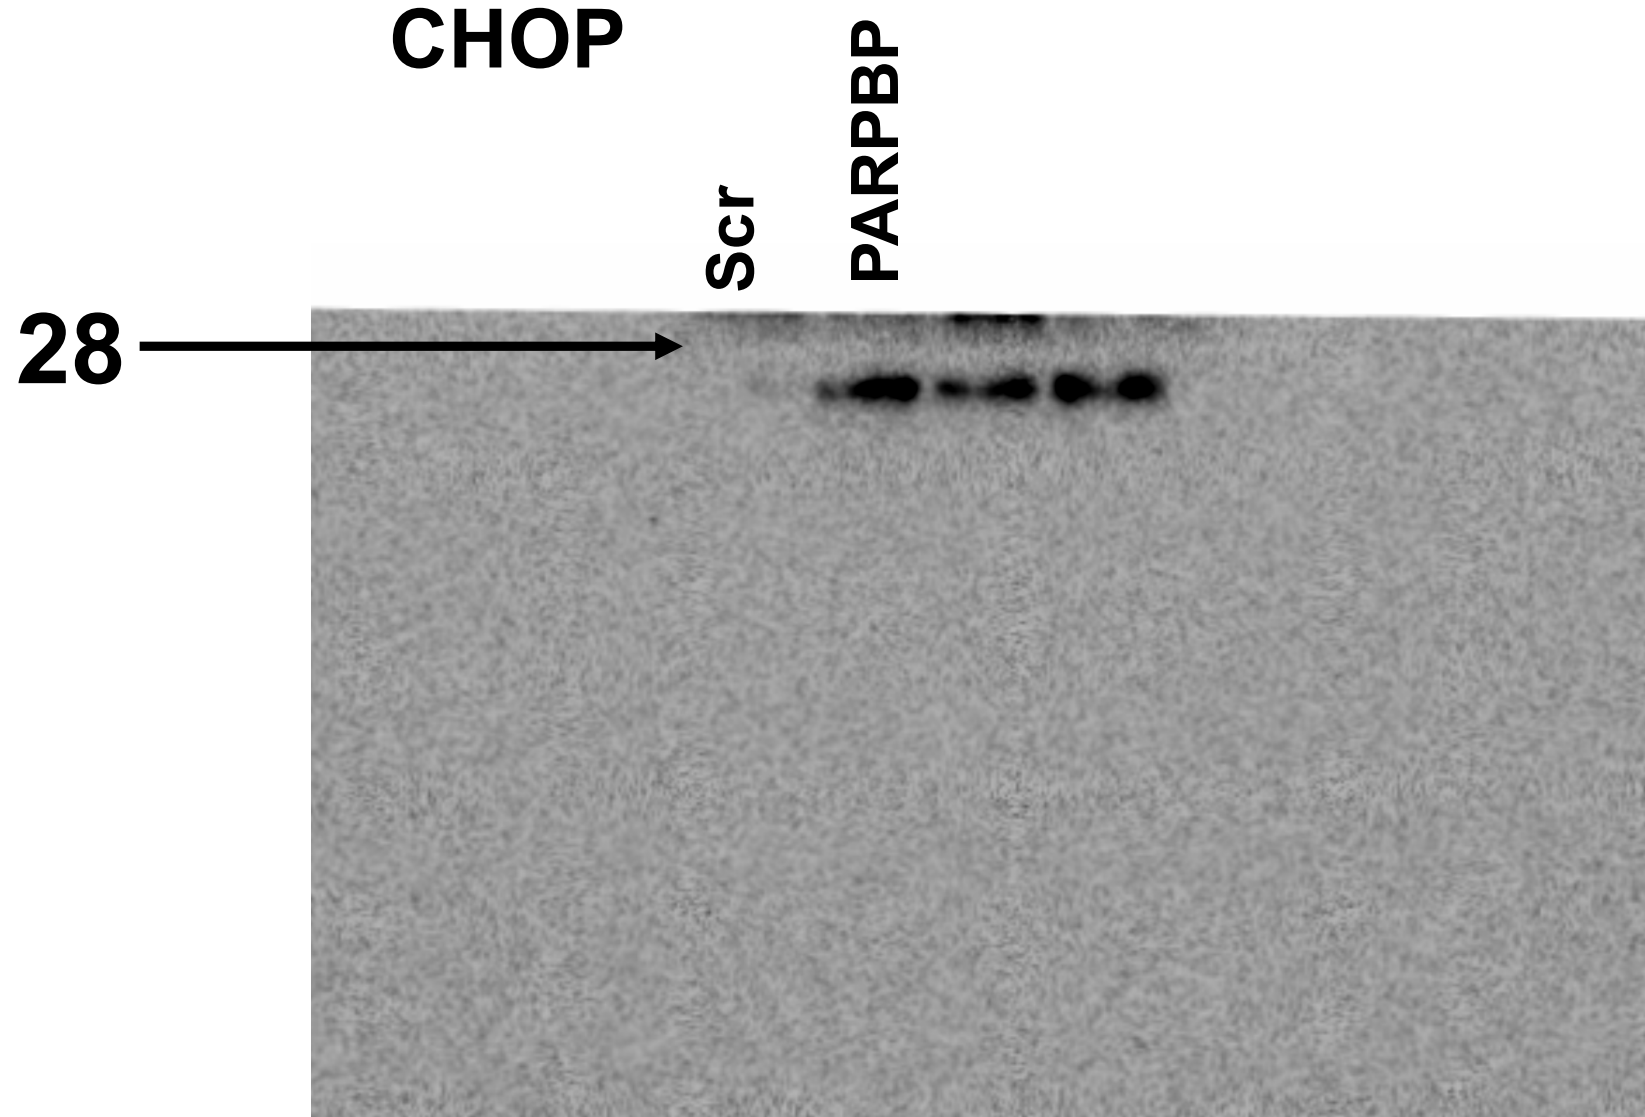

**FIGURE 4F**

**pEIF-alpha**

**Scr**

**PARPBP**

**38**

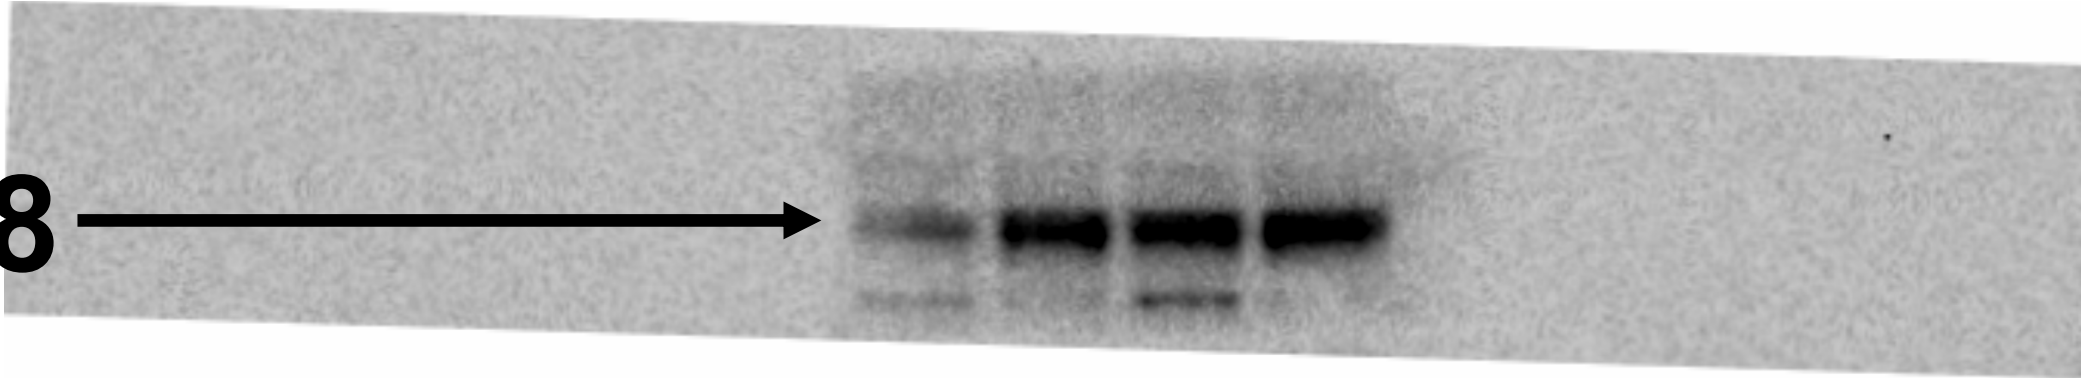

**FIGURE 4F**

**EIF-alpha**

**38**

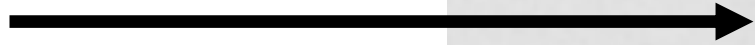

**Scr**

**PARPBP**

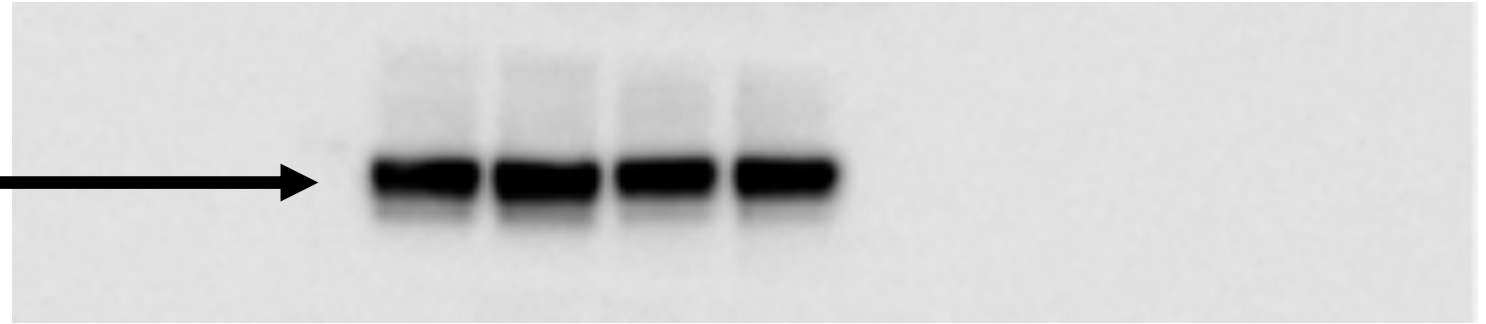

**FIGURE 4F**

**PARP (116) and cPARP (89)**

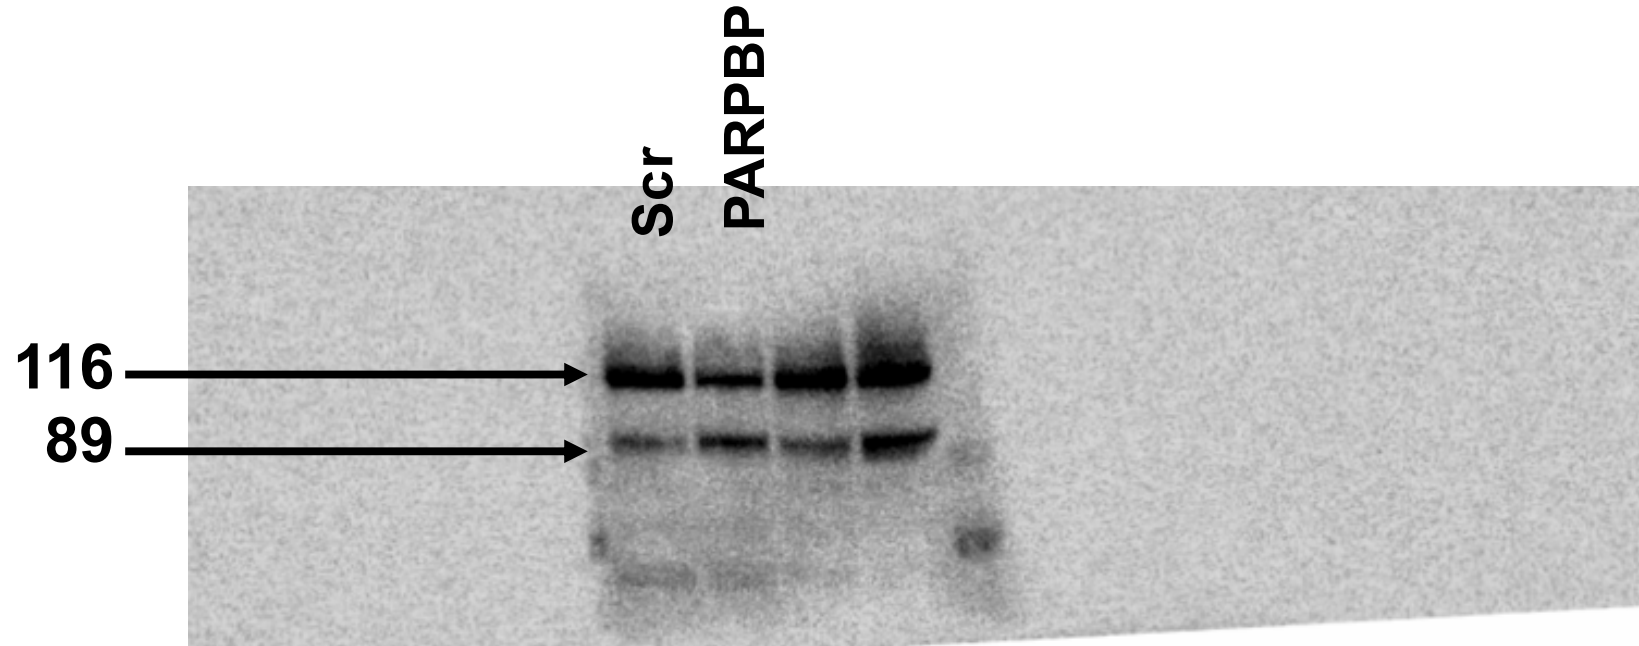



**FIGURE 4F**

**BACTIN**

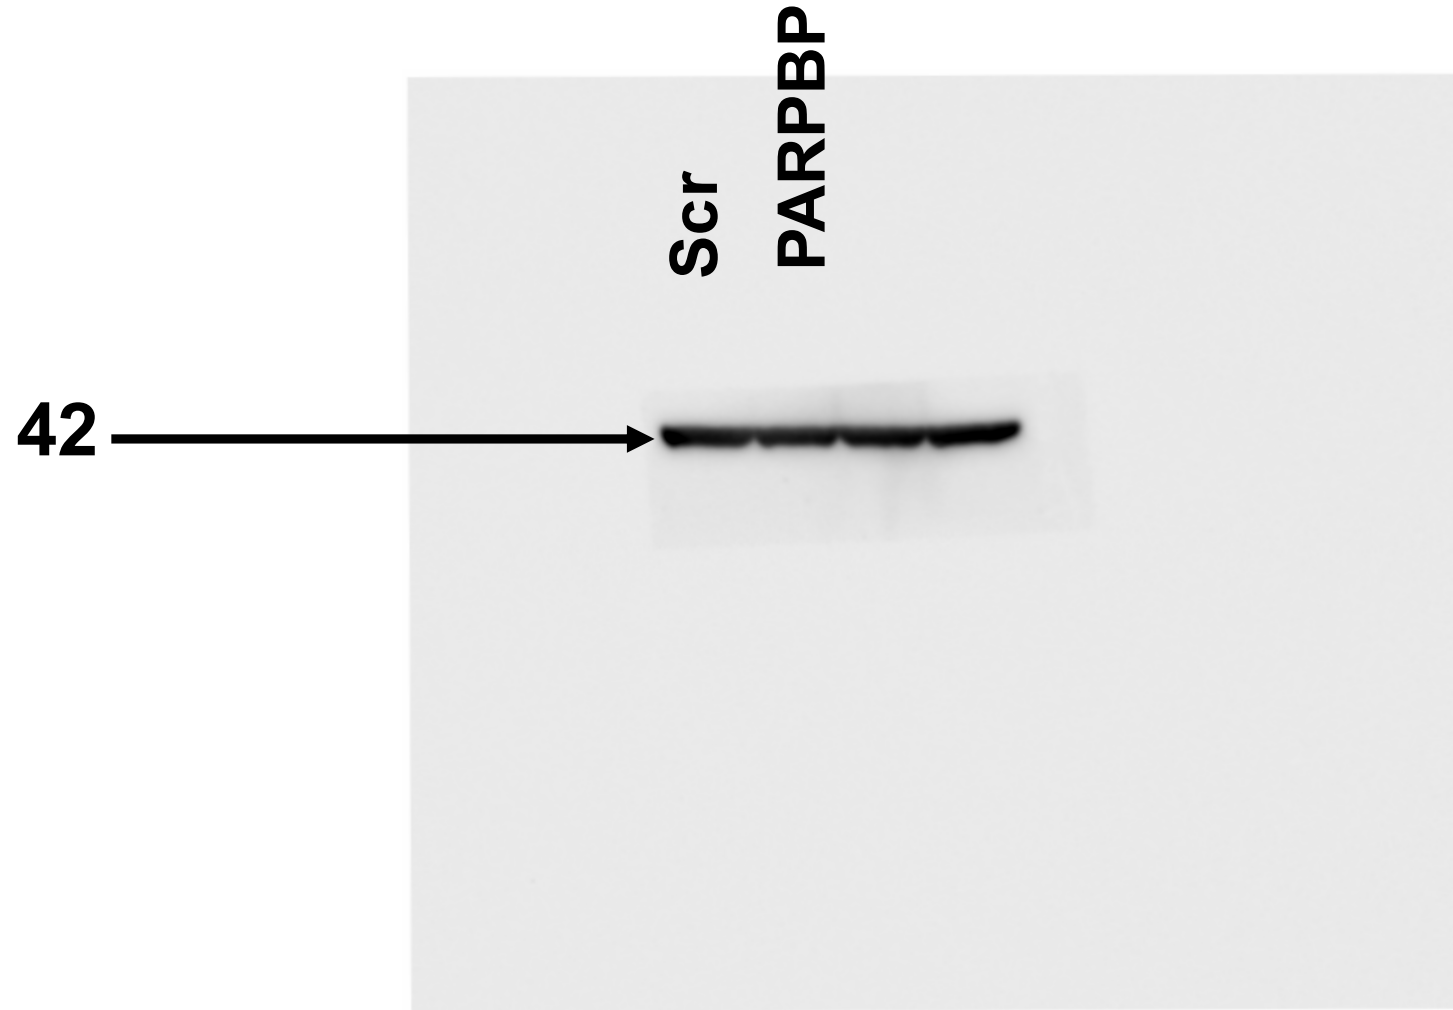

FIGURE 6

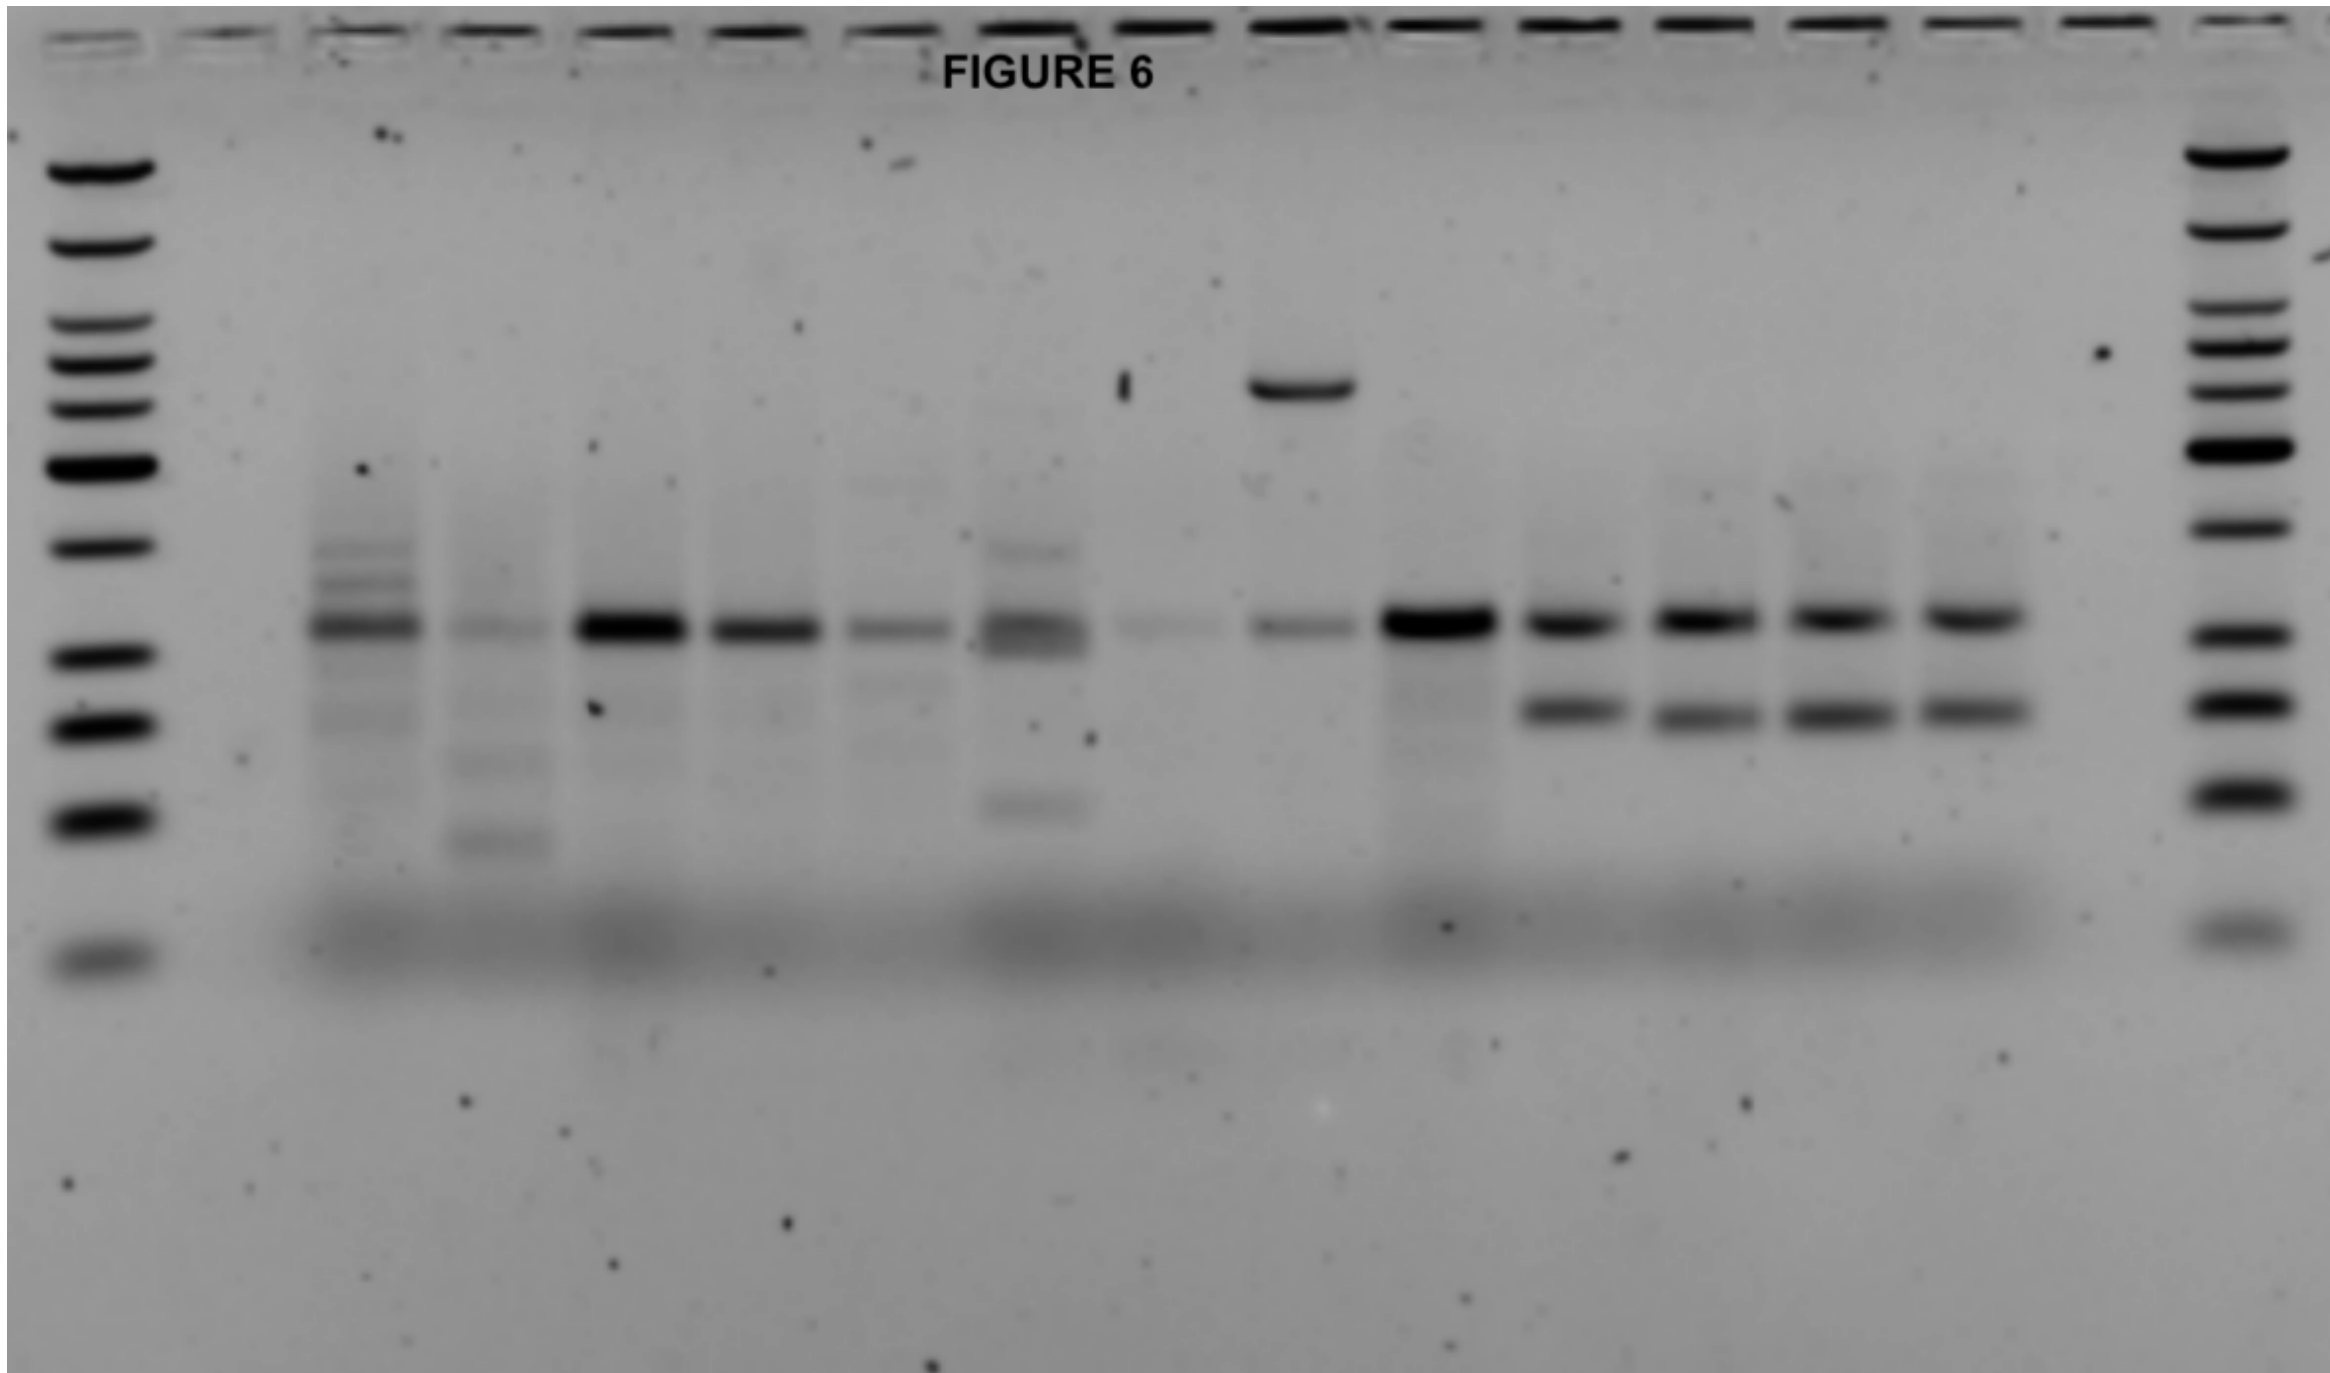

**SUPP FIGURE 2B**

**BACTIN**

SCR SYK

42

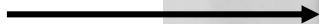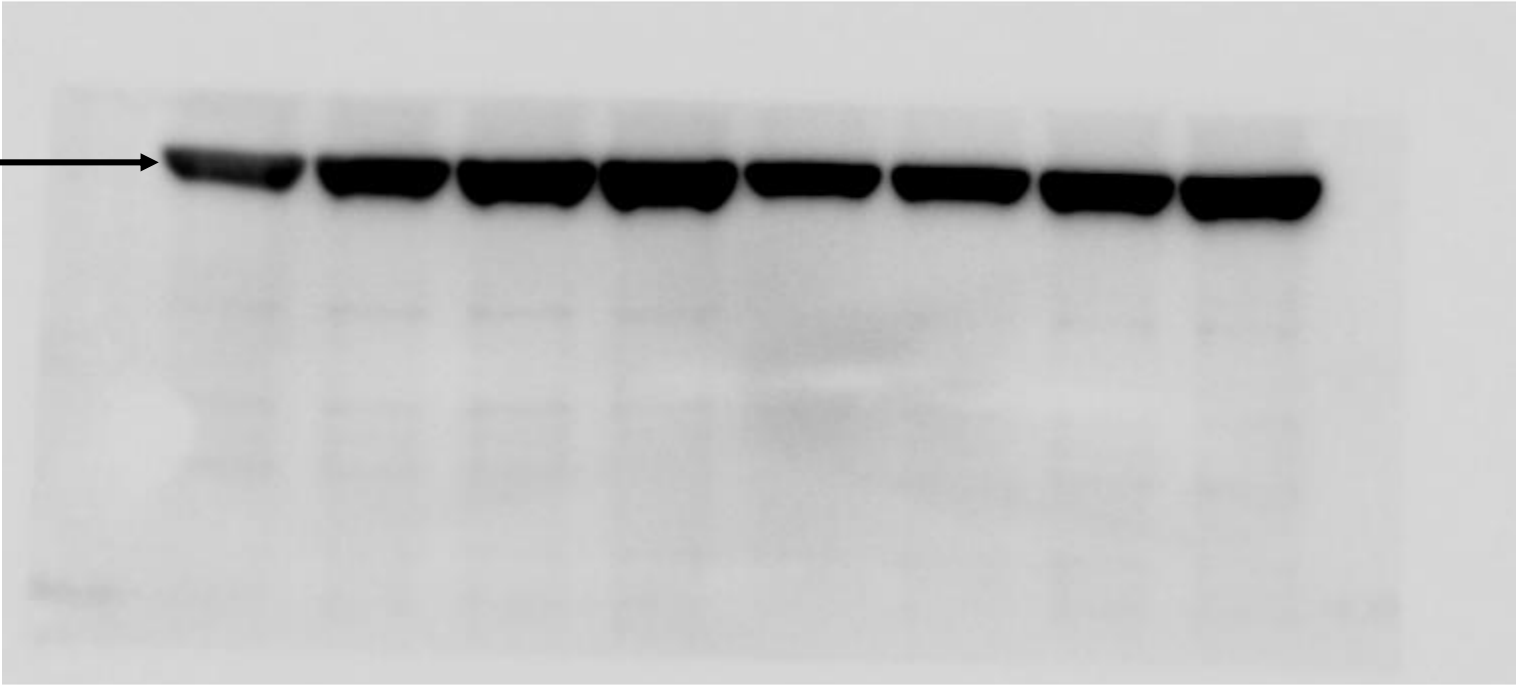

**SUPP FIGURE 2B**

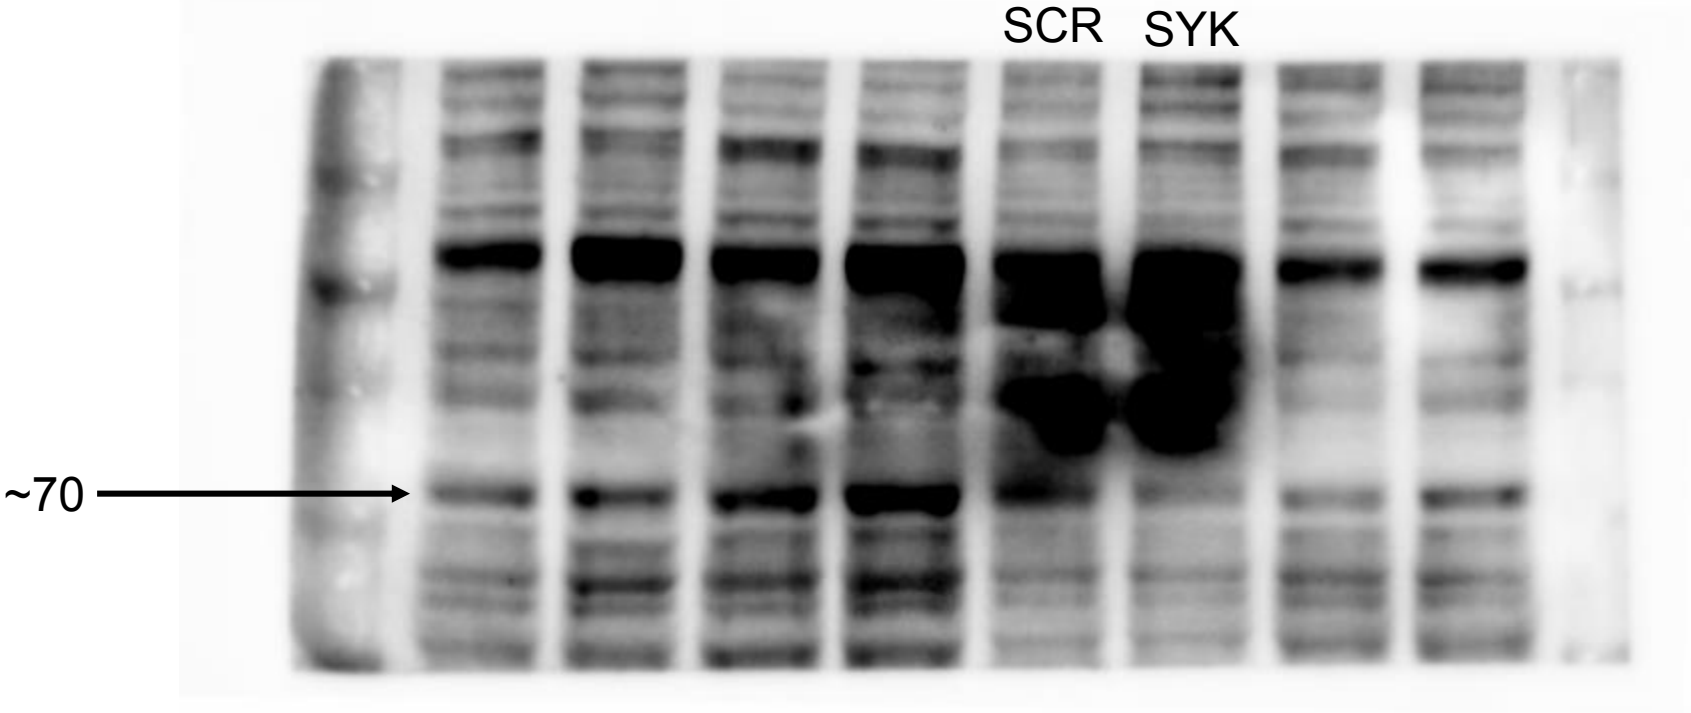

# SUPP FIGURE 2D

ETV2

TOTAL NUC  
SCR SYK SCR SYK

37 →

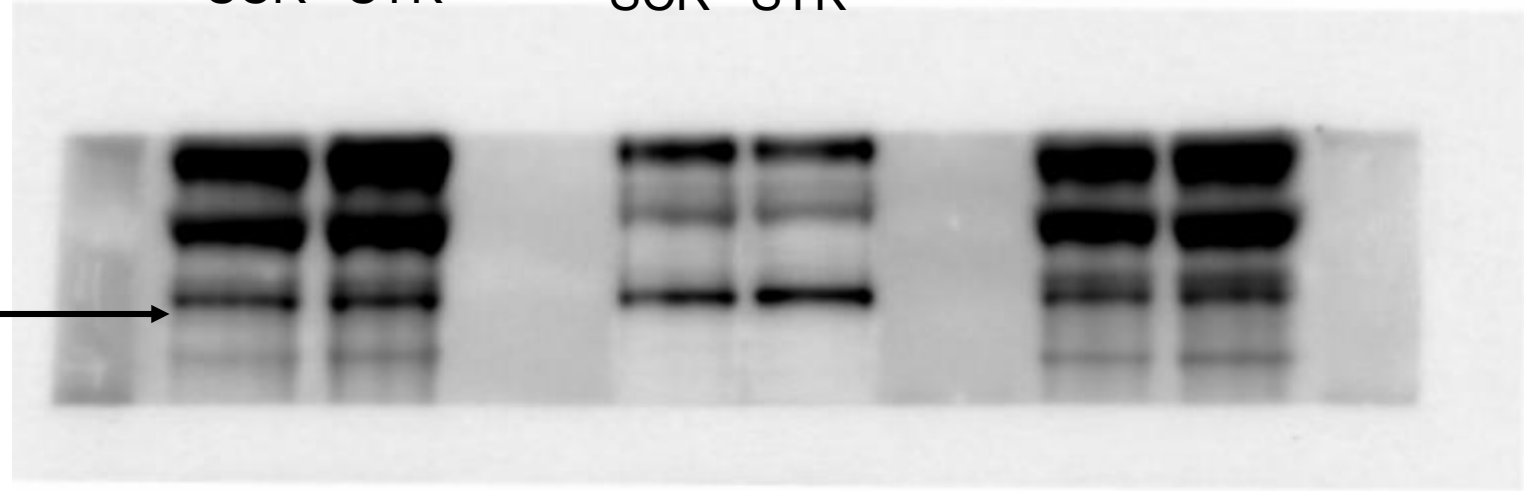

# SUPP FIGURE 2D

GAPDH

TOTAL  
SCR SYK

NUC  
SCR SYK

37

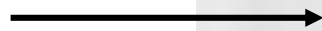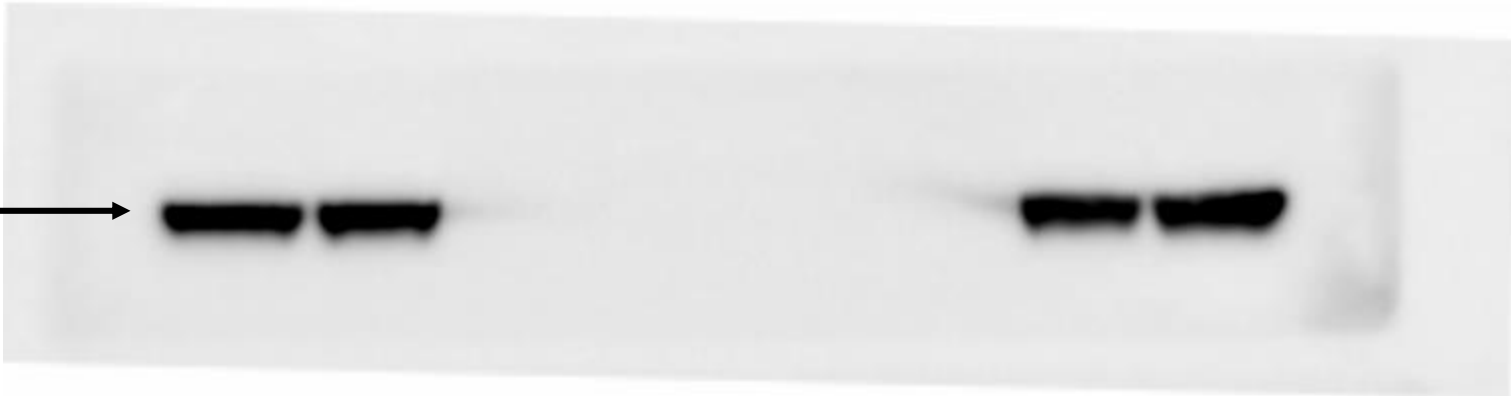

# SUPP FIGURE 2D

HISTONE

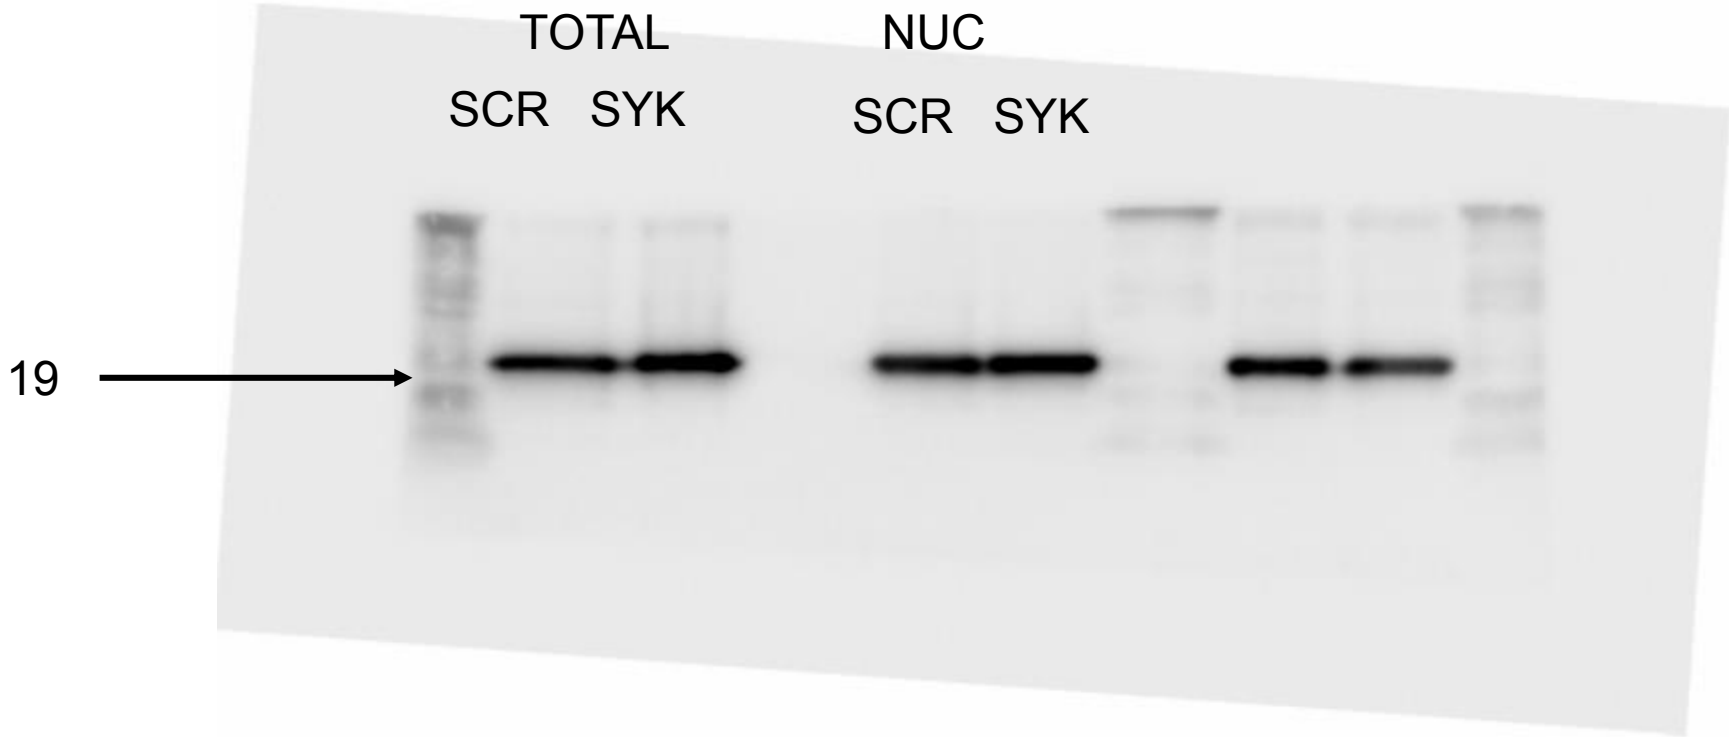



# SUPP FIGURE 2D

PARP

TOTAL NUC  
SCR SYK SCR SYK

116

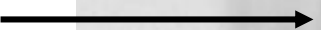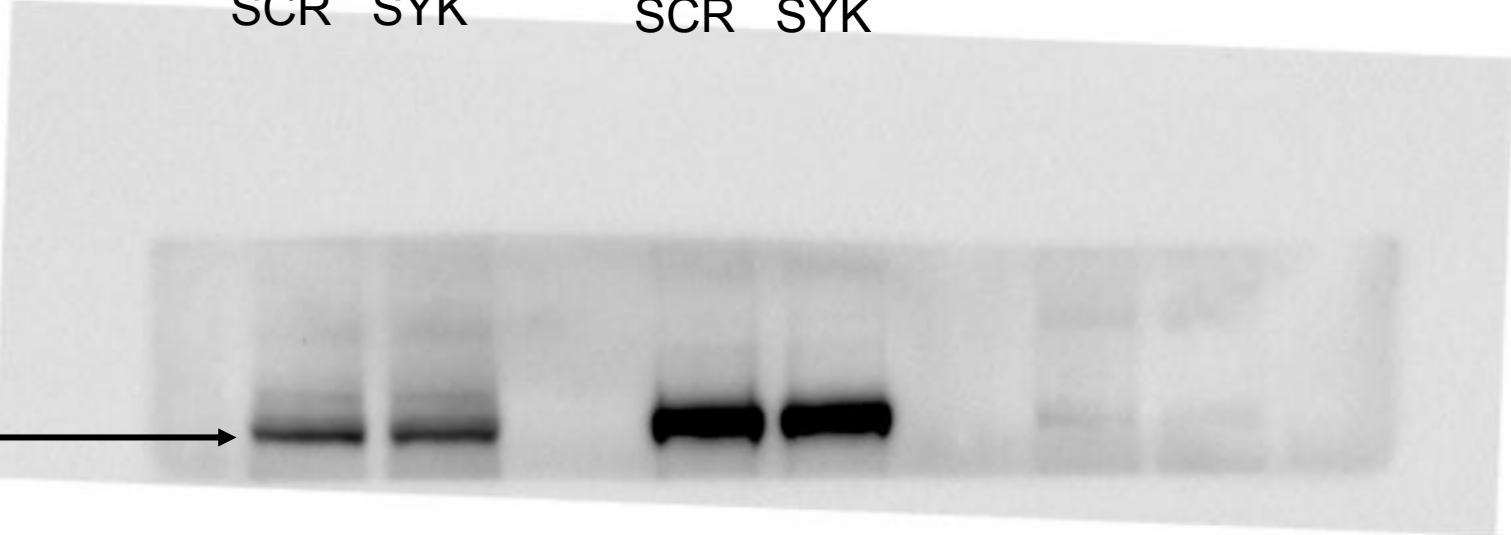

**SUPP FIGURE 3B**

**BACTIN**

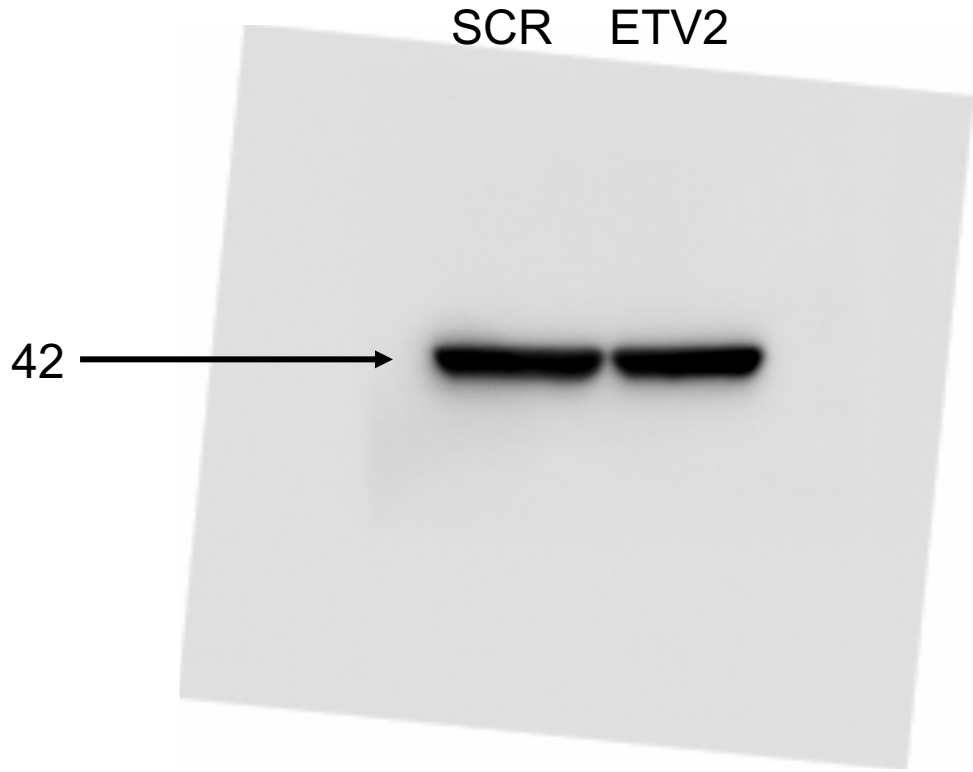

**SUPP FIGURE 3B**

**cPARP**

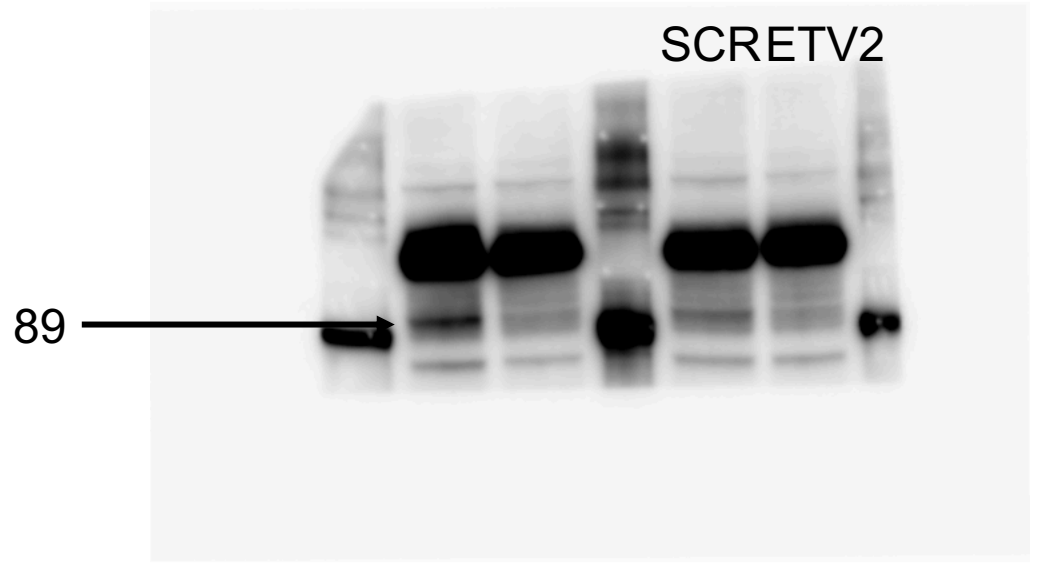

**SUPP FIGURE 3B**

**PARP**

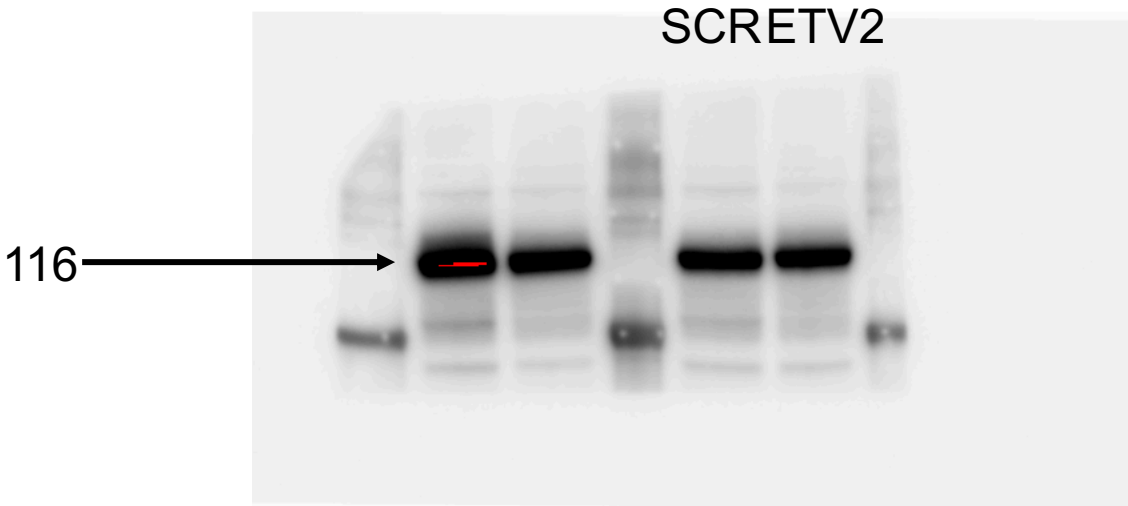

**SUPP FIGURE 3B**

**TUBERIN**

SCRETV2

200

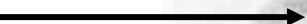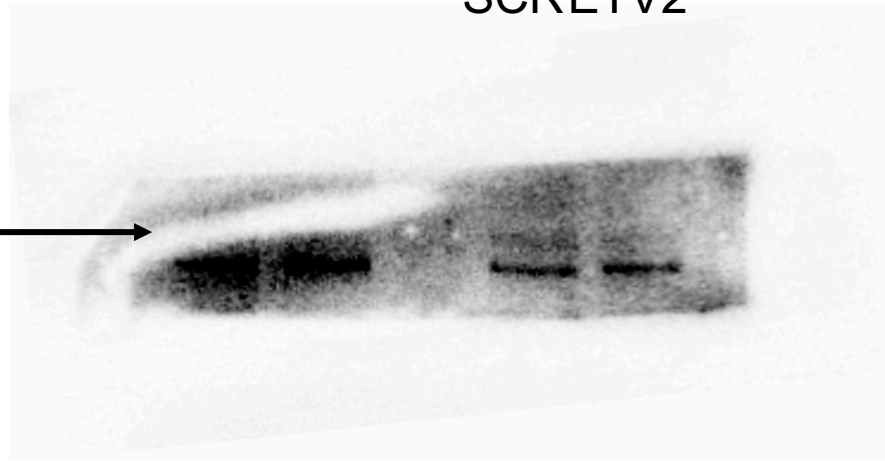

**SUPP FIGURE 3B**

**ETV2**

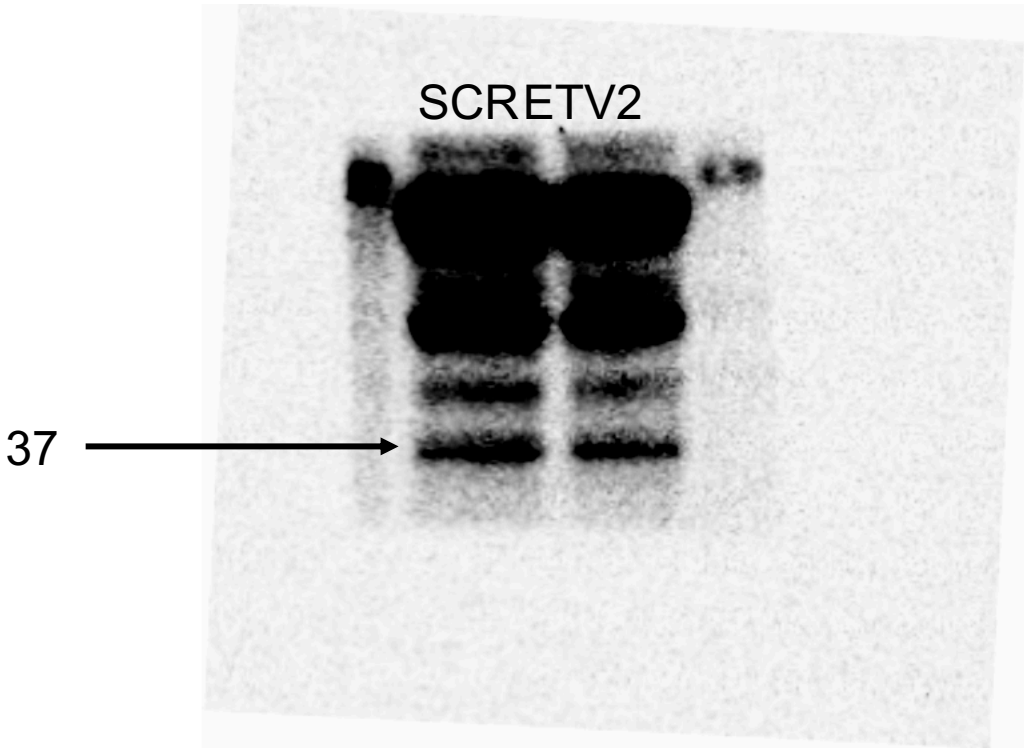

**SUPP FIGURE 4B**

**BACTIN**

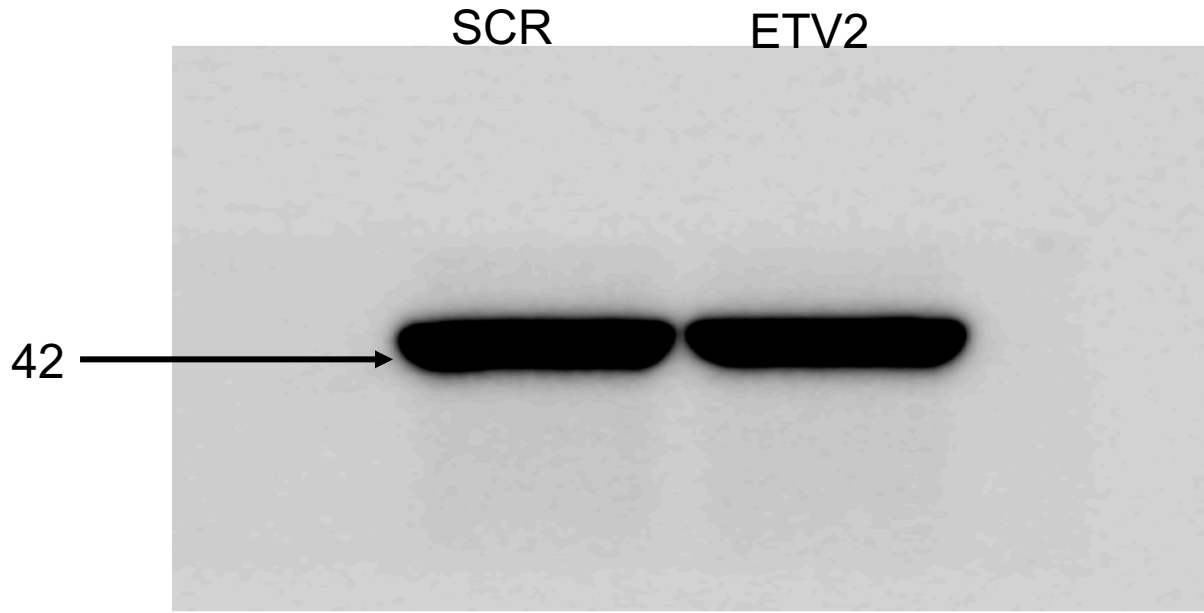



**SUPP FIGURE 4B**

**cPARP**

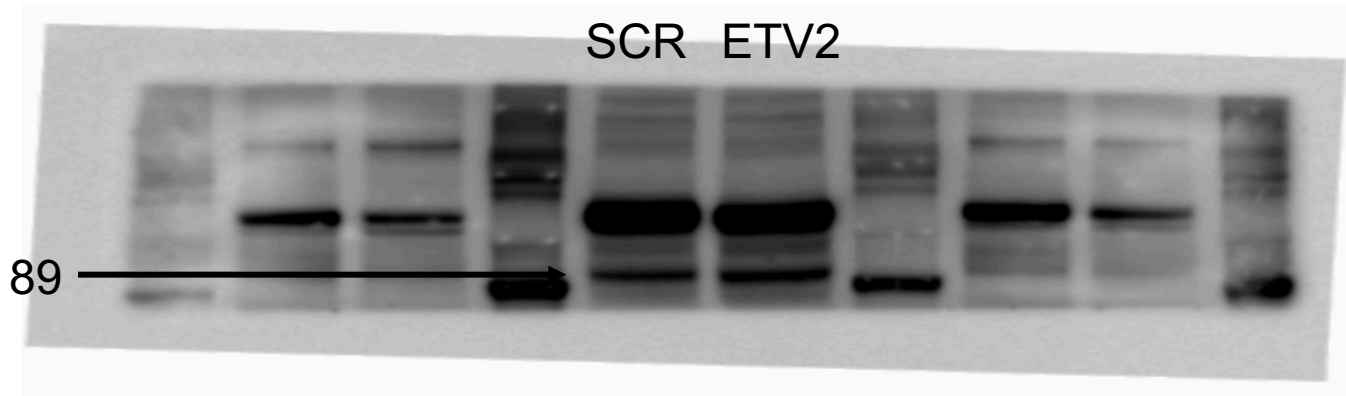

**SUPP FIGURE 4B**

**PARP**

SCRETV2

116

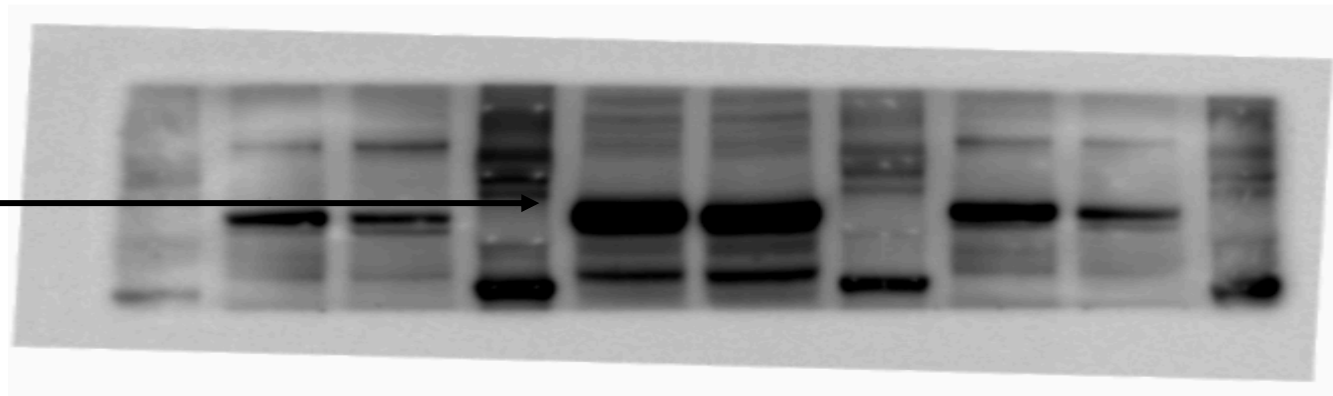

**SUPP FIGURE 4B**

**ETV2**

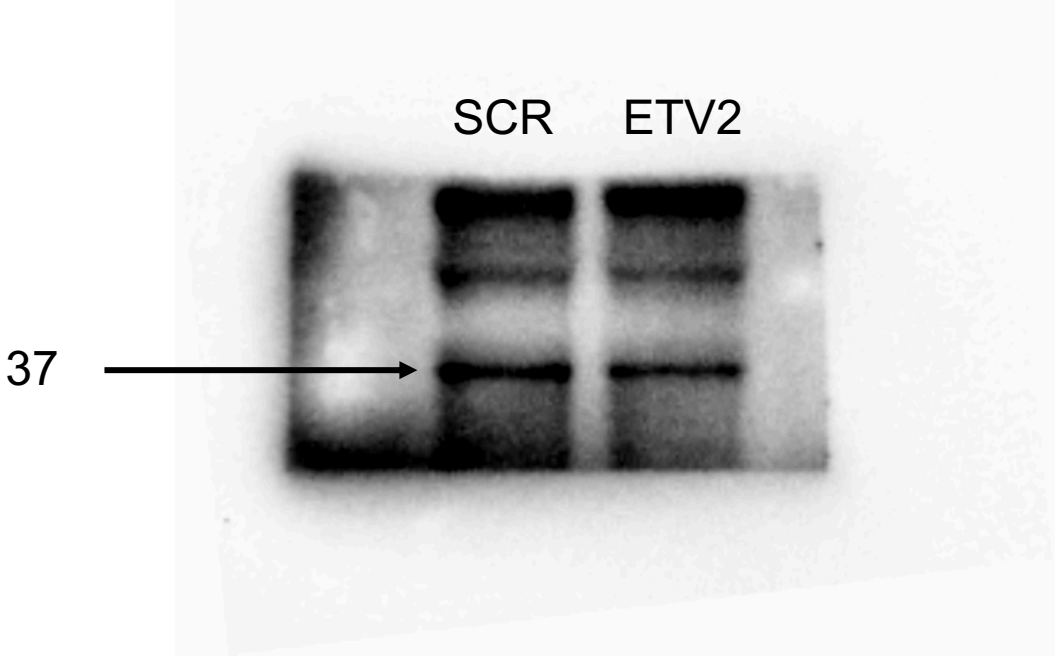

SUPP FIGURE 6

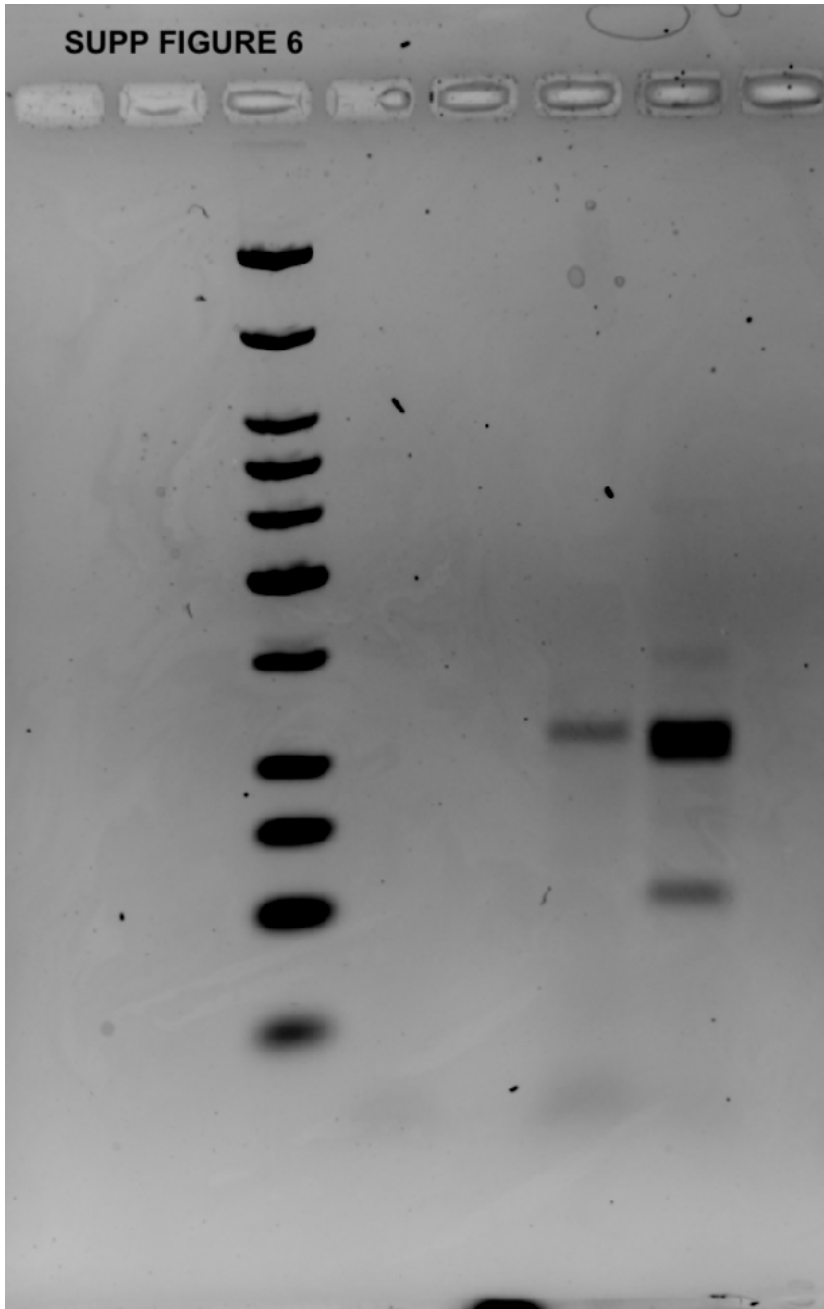

Figure 2A

| DMSO  | Sykl  | Rapamycin |
|-------|-------|-----------|
| 0.961 | 0.839 | 1.315     |
| 0.965 | 0.956 | 1.100     |
| 1.074 | 1.360 | 1.438     |

DMSO v. Sykl  
 $p = 0.8085$

DMSO v. Rapamycin  
 $p = 0.0513$

Figure 2B

| DMSO  | Sykl  | Rapamycin |
|-------|-------|-----------|
| 0.709 | 0.683 | 0.671     |
| 0.578 | 0.444 | 0.579     |
| 0.978 | 0.979 | 0.641     |
| 2.186 | 1.445 | 1.588     |
| 0.549 | 0.572 | 0.782     |

DMSO v. Sykl  
 $p = 0.1991$

DMSO v. Rapamycin  
 $p = 0.5513$

Figure 2E

|       |       |       |           |
|-------|-------|-------|-----------|
| DMSO  | Syki  | DMSO  | Rapamycin |
| 0.760 | 1.431 | 1.501 | 1.186     |
| 1.409 | 2.451 | 0.539 | 0.280     |
| 0.831 | 1.659 | 0.959 | 0.705     |

DMSO v.  
Syki  
 $p = 0.0040$

DMSO v.  
Rapamycin  
 $p = 0.0905$

Figure 3A

| Scr siRNA | Etv2 siRNA |
|-----------|------------|
| 1.00      | 0.00       |
| 1.00      | 0.10       |
| 1.00      | 0.48       |
| 1.00      | 0.30       |

Scr v. Etv2  
p = 0.0054

Figure 3C

| Scr siRNA | Etv2 siRNA |
|-----------|------------|
| 1.00      | 0.45       |
| 1.00      | 0.30       |
| 1.00      | 0.60       |
| 1.00      | 0.80       |

Scr v. Etv2  
p = 0.0227

Figure 3E

| Scr siRNA | Etv2 siRNA |
|-----------|------------|
| 19.00     | 42.10      |
| 27.40     | 52.00      |
| 11.00     | 22.90      |

Scr v. Etv2  
p = 0.0384

Figure 3G

| Scr siRNA | Etv2 siRNA |
|-----------|------------|
| 1.00      | 2.80       |
| 1.00      | 3.60       |
| 1.00      | 1.80       |
| 1.00      | 2.70       |
| 1.00      | 1.90       |

Scr v. Etv2  
p = 0.0091

Figure 3H

| Scr siRNA | Etv2 siRNA |
|-----------|------------|
| 1.00      | 1.30       |
| 1.00      | 2.30       |
| 1.00      | 1.40       |
| 1.00      | 2.40       |
| 1.00      | 1.60       |

Scr v. Etv2  
p = 0.0255

Figure 3I

| Scr siRNA | Etv2 siRNA |
|-----------|------------|
| 1.00      | 3.40       |
| 1.00      | 5.20       |
| 1.00      | 6.00       |
| 1.00      | 4.00       |

Scr v. Etv2  
p = 0.0083

Figure 3K

| Scr siRNA | Etv2 siRNA |
|-----------|------------|
| 28        | 65         |
| 9         | 92         |
| 47        | 184        |
| 50        | 100        |
| 30        | 219        |
| 12        | 119        |
| 32        | 136        |
| 20        | 198        |
| 22        | 128        |
| 26        | 152        |
| 52        | 151        |
| 35        | 146        |
| 22        | 69         |
| 21        | 84         |
| 24        | 100        |
| 18        | 28         |
| 34        | 9          |
| 11        | 28         |
| 46        | 9          |



|    |     |
|----|-----|
| 67 | 66  |
| 35 | 74  |
| 16 | 73  |
| 5  | 197 |
| 3  | 55  |
| 30 | 76  |
| 25 | 68  |
| 14 | 96  |
| 5  | 111 |
| 21 | 41  |
| 6  | 69  |
| 6  | 10  |
| 10 | 141 |
| 24 | 6   |
| 36 | 126 |
| 12 | 6   |
| 4  | 136 |
| 48 | 27  |
| 0  | 10  |
| 71 | 30  |
| 29 | 14  |
| 10 | 58  |
| 14 | 28  |
| 45 | 17  |
| 27 | 29  |
| 47 | 15  |
| 15 | 2   |
| 19 | 54  |
| 15 | 61  |
| 17 | 7   |
| 22 | 2   |
| 30 | 47  |
| 4  | 72  |
| 29 | 0   |
| 47 | 68  |
| 10 | 46  |
| 40 | 57  |
| 13 | 52  |
| 19 | 3   |
| 66 | 55  |
| 22 | 0   |
| 48 | 66  |
| 45 | 44  |
| 29 | 26  |
| 57 | 53  |

|     |     |
|-----|-----|
| 6   | 83  |
| 33  | 69  |
| 34  | 44  |
| 64  | 81  |
| 27  | 16  |
| 27  | 62  |
| 20  | 9   |
| 8   | 51  |
| 44  | 39  |
| 22  | 9   |
| 57  | 37  |
| 50  | 51  |
| 66  | 84  |
| 68  | 14  |
| 39  | 4   |
| 32  | 1   |
| 18  | 3   |
| 1   | 48  |
| 14  | 48  |
| 16  | 23  |
| 54  | 19  |
| 22  | 16  |
| 20  | 11  |
| 29  | 21  |
| 71  | 87  |
| 43  | 0   |
| 79  | 58  |
| 14  | 2   |
| 38  | 0   |
| 14  | 18  |
| 144 | 66  |
| 91  | 9   |
| 33  | 65  |
| 50  | 33  |
| 17  | 28  |
| 16  | 118 |
| 17  | 32  |
| 17  | 77  |
| 50  | 16  |
| 80  | 36  |
| 65  | 58  |
| 39  | 23  |
| 17  | 112 |
| 62  | 58  |
| 0   | 1   |

|    |     |
|----|-----|
| 32 | 16  |
| 92 | 34  |
| 16 | 31  |
| 15 | 38  |
| 46 | 44  |
| 10 | 60  |
| 3  | 85  |
| 4  | 46  |
| 61 | 42  |
| 15 | 81  |
| 37 | 48  |
| 6  | 76  |
| 43 | 24  |
| 60 | 66  |
| 6  | 36  |
| 54 | 20  |
| 15 | 41  |
| 18 | 90  |
| 50 | 34  |
| 29 | 38  |
| 21 | 37  |
| 14 | 51  |
| 46 | 72  |
| 0  | 67  |
| 26 | 24  |
| 2  | 0   |
| 16 | 5   |
| 47 | 45  |
| 61 | 18  |
| 68 | 54  |
| 23 | 134 |
| 24 | 12  |
| 71 | 35  |
| 22 | 26  |
| 0  | 53  |
| 30 | 40  |
| 8  | 53  |
| 35 | 20  |
| 14 | 51  |
| 17 | 47  |
| 85 | 36  |
| 37 | 55  |
| 27 | 74  |
| 11 | 85  |
| 11 | 56  |

|     |     |
|-----|-----|
| 1   | 33  |
| 29  | 84  |
| 6   | 43  |
| 5   | 66  |
| 8   | 32  |
| 0   | 101 |
| 27  | 69  |
| 12  | 70  |
| 25  | 42  |
| 27  | 144 |
| 32  | 37  |
| 33  | 43  |
| 44  | 26  |
| 28  | 87  |
| 20  | 23  |
| 19  | 52  |
| 34  | 178 |
| 113 | 30  |
| 24  | 50  |
| 28  | 19  |
| 59  | 70  |
| 59  | 40  |
| 22  | 83  |
| 16  | 23  |
| 56  | 66  |
| 35  | 30  |
| 9   | 9   |
| 32  | 1   |
| 9   | 19  |
| 12  | 88  |
| 116 | 18  |
| 22  | 9   |
| 23  | 18  |
| 73  | 23  |
| 102 | 36  |
| 2   | 67  |
| 72  | 34  |
| 28  | 2   |
| 9   | 24  |
| 12  | 24  |
| 33  | 51  |
| 75  | 33  |
| 35  | 111 |
| 56  | 13  |
| 11  | 13  |

|     |    |
|-----|----|
| 58  | 22 |
| 28  | 18 |
| 34  | 11 |
| 161 | 7  |
| 30  | 45 |
| 17  | 21 |
| 15  | 12 |
| 87  | 14 |
| 32  | 8  |
| 4   | 15 |
| 15  | 73 |
| 42  | 9  |
| 66  | 22 |
| 100 | 48 |
| 113 | 50 |
| 22  | 24 |
| 76  | 1  |
| 28  | 23 |
| 0   | 1  |
| 12  | 31 |
| 33  | 0  |
| 12  | 0  |

Scr v. Etv2  
 $p = 2.621E-06$

Figure 4A

|           | Scr siRNA |      |      |      | Etv2 siRNA |      |      |      |
|-----------|-----------|------|------|------|------------|------|------|------|
| DMSO      | 1.00      | 1.00 | 1.00 | 1.00 | 0.20       | 0.53 | 0.30 | 1.00 |
| Sykl      | 0.90      | 0.66 | 0.90 | 0.64 | 0.20       | 0.31 | 0.30 | 0.2  |
| Rapamycin | 0.40      | 0.27 | 0.60 |      | 0.20       | 0.17 | 0.20 |      |

P-Values - T-Test

|                                              |           |           |
|----------------------------------------------|-----------|-----------|
| Scr siRNA: DMSO vs. Sykl                     | 0.026     |           |
| Scr siRNA: DMSO vs. Rapamycin                | 0.013     |           |
| Scr siRNA: Sykl vs. Rapamycin                | 0.030     | 1.896E-09 |
| Etv2 siRNA: DMSO vs. Sykl                    | 0.003     |           |
| Etv2 siRNA: DMSO vs. Rapamycin               | 0.001     |           |
| Etv2 siRNA: Sykl vs. Rapamycin               | 0.153     |           |
| Scr siRNA DMSO vs. Etv2 siRNA DMSO           | 0.001     |           |
| Scr siRNA DMSO vs. Etv2 siRNA Sykl           | 3.437E-07 |           |
| Scr siRNA DMSO vs. Etv2 siRNA Rapamycin      | 1.896E-09 |           |
| Scr siRNA Rapamycin vs. Etv2 siRNA Rapamycin | 0.116     |           |

Figure 4B

|                   | SCR siRNA  |      |      |      |      |      |      |      |      |      |      |      |  |
|-------------------|------------|------|------|------|------|------|------|------|------|------|------|------|--|
| pGL3_Basic        | 0.29       | 0.36 | 1.05 | 0.88 | 0.23 | 0.75 | 0.42 | 0.62 |      |      |      |      |  |
| pGL3_promoter-150 | 0.82       | 1.22 | 0.96 | 1.04 | 1.12 | 0.84 | 0.66 | 1.83 | 0.51 | 0.89 | 1.02 | 1.09 |  |
| pGL3_promoter-386 | 3.42       | 8.09 | 3.15 | 3.39 | 3.54 | 4.66 | 7.14 | 4.5  | 8.56 | 7.08 | 3.34 | 4.04 |  |
|                   | ETV2 siRNA |      |      |      |      |      |      |      |      |      |      |      |  |
| pGL3_Basic        | 0.37       | 0.83 | 0.8  | 1.53 | 0.66 | 0.98 | 0.78 | 0.68 |      |      |      |      |  |
| pGL3_promoter-150 | 0.91       | 1.02 | 0.97 | 0.63 | 0.78 | 0.59 | 1.3  | 0.75 | 0.6  | 1.5  | 1.09 | 1.07 |  |
| pGL3_promoter-386 | 0.27       | 0.25 | 0.59 | 1.03 | 1.88 | 1.18 | 1.25 | 0.64 | 0.65 | 1.38 | 1.64 | 0.99 |  |
|                   | p-Value    |      |      |      |      |      |      |      |      |      |      |      |  |
| pGL3_Basic        | 0.1309     |      |      |      |      |      |      |      |      |      |      |      |  |
| pGL3_promoter-150 | 0.6048     |      |      |      |      |      |      |      |      |      |      |      |  |
| pGL3_promoter-386 | 1.2982E-05 |      |      |      |      |      |      |      |      |      |      |      |  |

Figure 4C

| Scr siRNA | 'arpbp siRNA |
|-----------|--------------|
| 1.00      | 0.20         |
| 1.00      | 0.01         |
| 1.00      | 0.01         |

Scr v. PARPBP  
p = 0.0048

Figure 4E

| Scr siRNA | 'arpbp siRNA |
|-----------|--------------|
| 1.00      | 0.60         |
| 1.00      | 0.40         |
| 1.00      | 0.40         |

Scr v. PARPBP  
p = 0.0153

Figure 4G

| Scr siRNA | 'arpbp siRNA |
|-----------|--------------|
| 1.00      | 7.60         |
| 1.00      | 2.70         |
| 1.00      | 4.20         |
| 1.00      | 6.10         |
| 1.00      | 1.50         |

Scr v. PARPBP  
p = 0.0365

Figure 4H

| Scr siRNA | 'arpbp siRNA |
|-----------|--------------|
| 1.00      | 4.30         |
| 1.00      | 2.20         |
| 1.00      | 1.50         |
| 1.00      | 3.50         |
| 1.00      | 1.80         |

Scr v. PARPBP  
p = 0.0153

Figure 4I

| Scr siRNA | 'arpbp siRNA |
|-----------|--------------|
| 1.00      | 1.36         |
| 1.00      | 1.48         |
| 1.00      | 2.09         |
| 1.00      | 3.26         |
| 1.00      | 2.82         |

Scr v. PARPBP  
p = 0.0316

Figure 5B

|     |      | Scr siRNA  |      |      |      |      |
|-----|------|------------|------|------|------|------|
| 4H  | 0.80 | 1.20       | 0.81 | 1.19 |      |      |
| 24H | 0.59 | 1.41       | 1.31 | 0.69 |      |      |
| 48H | 1.08 | 0.92       | 1.22 | 0.78 |      |      |
|     |      | ETV2 siRNA |      |      |      |      |
| 4H  | 1.57 | 0.79       | 0.67 | 0.72 | 0.81 | 0.43 |
| 24H | 0.61 | 0.50       | 0.52 | 0.37 | 0.47 | 0.19 |
| 48H | 0.69 | 0.66       | 0.24 | 0.70 | 0.96 | 0.61 |

Unpaired T-Test Scr v. Etv2

|     |        |
|-----|--------|
| 4H  | 0.4591 |
| 24H | 0.0156 |
| 48H | 0.0348 |

Figure 5C

| Scr siRNA | ETV2 siRNA |
|-----------|------------|
| 0.97      | 0.69       |
| 0.96      | 0.49       |
| 1.00      | 0.30       |
| 1.27      | 0.60       |
|           | 0.59       |
|           | 0.55       |

Figure 5D

| Scr siRNA | ETV2 siRNA |
|-----------|------------|
| 0.97      | 0.69       |
| 0.96      | 0.49       |
| 1.00      | 0.30       |
| 1.27      | 0.60       |
|           | 0.59       |
|           | 0.55       |

Scr v. Etv2  
p = 0.0004

Supplementary Figure 1A

|      |       |      |      |      |           |      |      |      |           |      |      |      |
|------|-------|------|------|------|-----------|------|------|------|-----------|------|------|------|
|      | Fabp5 |      |      |      | Trib3     |      |      |      | Psat1     |      |      |      |
| DMSO | 1.04  | 1.00 | 0.98 | 0.98 | 1.00      | 1.06 | 0.96 | 0.98 | 0.99      | 1.01 | 0.99 | 1.01 |
| Sykl | 0.09  | 0.07 | 0.08 | 0.08 | 0.09      | 0.10 | 0.22 | 0.26 | 0.13      | 0.14 | 0.12 | 0.12 |
| Rapa | 0.06  | 0.06 | 0.06 | 0.07 | 0.05      | 0.01 | 0.13 | 0.12 | 0.10      | 0.03 | 0.09 | 0.09 |
|      | Tfrc  |      |      |      | Serpina12 |      |      |      | Loc689757 |      |      |      |
| DMSO | 1.01  | 1.00 | 1.00 | 0.99 | 0.97      | 0.96 | 1.10 | 0.96 | 1.00      | 1.00 | 1.00 | 1.00 |
| Sykl | 0.21  | 0.21 | 0.14 | 0.12 | 0.08      | 0.07 | 0.06 | 0.11 | 0.27      | 0.22 | 0.25 | 0.25 |
| Rapa | 0.11  | 0.01 | 0.12 | 0.08 | 0.21      | 0.05 | 0.07 | 0.06 | 0.24      | 0.15 | 0.24 | 0.22 |
|      | Phgdh |      |      |      | PspH      |      |      |      |           |      |      |      |
| DMSO | 1.09  | 0.96 | 1.00 | 0.96 | 0.88      | 1.10 | 1.15 | 0.86 |           |      |      |      |
| Sykl | 0.18  | 0.19 | 0.13 | 0.13 | 0.28      | 0.63 | 0.48 | 0.21 |           |      |      |      |
| Rapa | 0.29  | 0.03 | 0.12 | 0.07 | 0.20      | 0.27 | 0.32 | 0.47 |           |      |      |      |

Supplementary Figure 1B

|      |           |      |      |      |       |      |      |      |        |      |      |      |
|------|-----------|------|------|------|-------|------|------|------|--------|------|------|------|
|      | Bub1      |      |      |      | Ska1  |      |      |      | Fancd2 |      |      |      |
| DMSO | 1.00      | 1.00 | 1.00 | 1.00 | 0.99  | 0.99 | 1.02 | 0.99 | 1.00   | 1.00 | 1.00 | 1.00 |
| Sykl | 0.49      | 0.30 | 0.61 | 0.49 | 0.35  | 0.36 | 0.39 | 0.33 | 0.65   | 0.63 | 0.68 | 0.59 |
| Rapa | 0.35      | 0.04 | 0.22 | 0.25 | 0.23  | 0.18 | 0.25 | 0.27 | 0.30   | 0.01 | 0.37 | 0.33 |
|      | Arhgap11a |      |      |      | Kif2c |      |      |      | Ube2c  |      |      |      |
| DMSO | 1.00      | 1.00 | 1.00 | 1.00 | 1.00  | 0.99 | 1.01 | 1.00 | 1.00   | 1.00 | 1.00 | 1.00 |
| Sykl | 0.53      | 0.67 | 0.55 | 0.50 | 0.46  | 0.43 | 0.48 | 0.37 | 0.55   | 0.54 | 0.48 | 0.46 |
| Rapa | 0.28      | 0.05 | 0.37 | 0.24 | 0.26  | 0.01 | 0.40 | 0.28 | 0.32   | 0.19 | 0.31 | 0.29 |
|      | Esco2     |      |      |      | Pbk   |      |      |      |        |      |      |      |
| DMSO | 1.01      | 0.99 | 1.01 | 0.99 | 0.99  | 1.01 | 1.00 | 1.00 |        |      |      |      |
| Sykl | 1.03      | 0.47 | 0.57 | 0.65 | 0.51  | 0.50 | 0.82 | 0.53 |        |      |      |      |
| Rapa | 0.43      | 0.23 | 0.31 | 0.44 | 0.32  | 0.18 | 0.47 | 0.39 |        |      |      |      |

Supplementary Figure 1C

|      |        |      |      |      |
|------|--------|------|------|------|
|      | Mospd2 |      |      |      |
| DMSO | 1.00   | 1.00 | 1.00 | 1.00 |
| Sykl | 0.49   | 0.30 | 0.61 | 0.49 |
| Rapa | 0.35   | 0.04 | 0.22 | 0.25 |

Supplementary Figure 1D

|      |       |      |      |       |              |      |      |       |         |      |      |      |
|------|-------|------|------|-------|--------------|------|------|-------|---------|------|------|------|
|      | Vof16 |      |      |       | Loc100360867 |      |      |       | Tcp11l2 |      |      |      |
| DMSO | 1.07  | 0.98 | 1.00 | 0.95  | 1.02         | 0.99 | 0.99 | 0.99  | 1.00    | 1.00 | 1.00 | 1.00 |
| Sykl | 4.09  | 3.96 | 5.78 | 10.01 | 3.57         | 2.70 | 2.69 | 2.14  | 8.03    | 8.30 | 7.33 | 6.27 |
| Rapa | 3.33  | 2.69 | 5.94 | 8.12  | 2.85         | 0.95 | 4.19 | 2.56  | 8.17    | 1.87 | 9.61 | 7.54 |
|      | Itga8 |      |      |       | Edn1         |      |      |       | Col8a1  |      |      |      |
| DMSO | 0.99  | 0.99 | 1.02 | 1.00  | 1.08         | 0.97 | 0.98 | 0.97  | 0.99    | 0.98 | 1.02 | 1.01 |
| Sykl | 4.40  | 9.11 | 3.16 | 1.94  | 2.85         | 4.29 | 3.02 | 7.71  | 5.14    | 7.86 | 5.93 | 3.95 |
| Rapa | 3.74  | 0.49 | 4.80 | 5.92  | 3.90         | 1.40 | 4.33 | 8.92  | 5.62    | 0.02 | 5.51 | 5.16 |
|      | Dusp6 |      |      |       | Cyp3a9       |      |      |       |         |      |      |      |
| DMSO | 0.98  | 1.02 | 1.00 | 0.99  | 1.01         | 0.99 | 1.01 | 0.99  |         |      |      |      |
| Sykl | 6.26  | 4.51 | 5.52 | 3.64  | 4.04         | 6.12 | 3.66 | 4.03  |         |      |      |      |
| Rapa | 6.47  | 1.30 | 5.62 | 7.24  | 4.26         | 1.25 | 3.09 | 10.19 |         |      |      |      |



Supp Figure 2A

| Scr siRNA | Syk siRNA |
|-----------|-----------|
| 1.00      | 0.06      |
| 1.00      | 0.15      |
| 1.00      | 0.41      |
| 1.00      | 0.04      |

Scr v. Syk  
p = 0.0011

Supp Figure 2C

| Scr siRNA | Syk siRNA |
|-----------|-----------|
| 1.00      | 0.54      |
| 1.00      | 0.65      |
| 1.00      | 0.34      |

Scr v. Syk  
p = 0.0162

Supp Figure 2E

| Scr siRNA | Syk siRNA |
|-----------|-----------|
| 1.00      | 1.52      |
| 1.00      | 1.41      |
| 1.00      | 0.88      |

Scr v. Syk  
p = 0.1528

Supp Figure 2F

| Scr siRNA | Syk siRNA |
|-----------|-----------|
| 1.00      | 1.55      |
| 1.00      | 1.55      |
| 1.00      | 1.75      |

Scr v. Syk  
p = 0.0059

Supp Figure 2G

| Scr siRNA | Syk siRNA |
|-----------|-----------|
| 1.00      | 1.80      |
| 1.00      | 2.06      |
| 1.00      | 1.81      |

Scr v. Syk  
p = 0.0044

Supplementary Figure 3A

| Scr siRNA | Etv2 siRNA |
|-----------|------------|
| 1.00      | 0.30       |
| 1.00      | 0.20       |
| 1.00      | 0.30       |
| 1.00      | 0.13       |

Scr v. Etv2  
0.0002

Supplementary Figure 3C

| Scr siRNA | Etv2 siRNA |
|-----------|------------|
| 1.00      | 0.75       |
| 1.00      | 0.60       |
| 1.00      | 0.71       |
| 1.00      | 0.65       |

Scr v. Etv2  
p = 0.0014

Supplementary Figure 3D

| Scr siRNA | Etv2 siRNA |
|-----------|------------|
| 1.00      | 1.26       |
| 1.00      | 1.09       |
| 1.00      | 0.86       |
| 1.00      | 1.04       |

Scr v. Etv2  
p = 0.2510

Supplementary Figure 4A

| Scr siRNA | Etv2 siRNA |
|-----------|------------|
| 1.00      | 0.34       |
| 1.00      | 0.28       |
| 1.00      | 0.60       |

Scr v. Etv2  
p = 0.0132

Supplementary Figure 4C

| Scr siRNA | Etv2 siRNA |
|-----------|------------|
| 1.00      | 0.44       |
| 1.00      | 0.72       |
| 1.00      | 0.69       |

Scr v. Etv2  
p = 0.0255

Supplementary Figure 4D

| Scr siRNA | Etv2 siRNA |
|-----------|------------|
| 1.00      | 1.73       |
| 1.00      | 2.17       |
| 1.00      | 1.43       |

Scr v. Etv2  
p = 0.0344

Supplementary Figure 2A

| DMSO | Sykl | Rapamycin |
|------|------|-----------|
| 1.00 | 0.58 | 0.34      |
| 1.00 | 0.62 | 0.03      |
| 1.00 | 0.78 | 0.46      |
| 1.00 | 0.55 | 0.35      |

|                    | P-Value |
|--------------------|---------|
| DMSO vs. Sykl      | 0.0052  |
| DMSO vs. Rapamycin | 0.0048  |
| Sykl vs. Rapamycin | 0.0302  |

Supplementary Figure 2B

| Scr siRNA | ETV2 siRNA | PARPBP siRNA |
|-----------|------------|--------------|
| 1.000     | 0.170      | 0.200        |
| 1.000     | 0.180      | 0.007        |
| 1.000     | 0.151      | 0.007        |

|                             |        |
|-----------------------------|--------|
| Scr siRNA vs. ETV2 siRNA    | 0.0001 |
| Scr siRNA vs. PARPBP siRNA  | 0.0048 |
| ETV2 siRNA vs. PARPBP siRNA | 0.2703 |
